# Supplementary material for: “The red cage”: implementation of pH-responsiveness within a macrobicyclic pyridinium-based molecular host
Source: Royal Society of Chemistry journal article supplement (doi:10.1039/d1qo01331a), 2021-11-09
Supplement: d1qo01331a1.pdf [file d1qo01331a1.pdf]

# Supporting Information

## Table of contents

|                                                                                                                   |    |
|-------------------------------------------------------------------------------------------------------------------|----|
| 1. Materials and general methods .....                                                                            | 1  |
| 2. Synthetic Procedures and characterization. ....                                                                | 2  |
| 3. Acid-base studies of the Red Cage. ....                                                                        | 23 |
| 4. Determination of the energy of the rotational barrier ( $\Delta G^\ddagger$ ). ....                            | 25 |
| 5. Guest recognition ability of C·6Cl. ....                                                                       | 26 |
| 6. $^1\text{H}$ NMR titration experiments determination of $K_a$ value for inclusion complexes in water.<br>..... | 28 |
| 7. X-ray Crystallography .....                                                                                    | 33 |
| 8. References .....                                                                                               | 35 |

## 1. Materials and general methods

All reagents and solvents were purchased from commercial sources and used without further purification. Manipulations were performed under normal atmosphere unless special noted. Merck 60 F<sub>254</sub> foils were used for thin layer chromatography, and Merck 60 (230-400 mesh) silica gel was used for flash chromatography. Nuclear magnetic resonance (NMR) spectra were recorded at ambient temperature using Bruker AVANCE III 400/500 and Agilent DD2 600 spectrometers, with working frequencies of 400/500/600 and 100/125/150 MHz for <sup>1</sup>H and <sup>13</sup>C, respectively. Chemical shifts are reported in ppm relative to the residual internal non deuterated solvent signals (D<sub>2</sub>O:  $\delta$  = 4.79 ppm, DMSO-d<sub>6</sub>:  $\delta$  = 2.50 ppm, CD<sub>3</sub>CN:  $\delta$  = 1.94 ppm). High-resolution mass spectra (HRMS) were recorded on a Fourier transform ion cyclotron resonance mass spectrometry (FT-ICR MS) and LTC-Orbitrap Discovery mass spectrometer. HPLC purifications were performed on an Agilent 1260 Infinity II with a semipreparative column Luna<sup>®</sup> Omega 5  $\mu$ m Polar C18 100 Å. UV/vis spectra were recorded on a Jasco V-650 spectrometer. Potentiometric measures were carried out with CRISON 5028 pH electrode for microsamples with Ag/AgCl reference element. X-ray crystallographic data were collected on a Bruker D8 Venture diffractometer.

## 2. Synthetic Procedures and characterization.

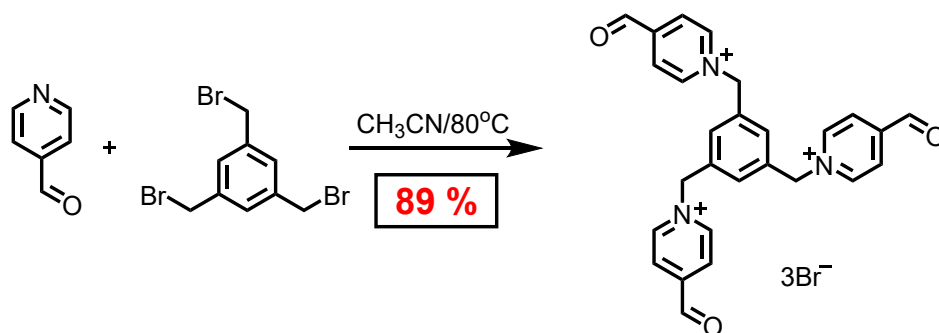

**Scheme S1.** Synthesis of  $\mathbf{H}_1 \cdot 3\text{Br}$ .

$\mathbf{H}_1 \cdot 3\text{Br}$ : 4-pyridinecarboxaldehyde (1.50 g, 14 mmol) and 1,3,5-Tri(bromomethyl) benzene (500 mg, 1.4 mmol) were dissolved in 100 mL of acetonitrile and heated at reflux for 48 hours. The resulting precipitate was filtered and washed with hot acetonitrile (3 x 20 mL) to give the pure product  $\mathbf{H}_1 \cdot 3\text{Br}$  (912 mg, 89 %) as a yellow powder.  $^1\text{H}$  NMR (500 MHz,  $\text{D}_2\text{O}$ )  $\delta$  (ppm): 8.84 (d,  $J = 5$  Hz, 6H), 8.10 (d,  $J = 5$  Hz, 6H), 7.54 (s, 3H), 6.15 (s, 3H), 5.81 (s, 6H).  $^{13}\text{C}$  NMR (125 MHz,  $\text{D}_2\text{O}$ )  $\delta$  (ppm): 160.60, 144.77, 135.36, 130.69, 125.72, 87.42, 63.05. HRMS (ESI):  $m/z$  calculated for  $\text{C}_{27}\text{H}_{30}\text{N}_3\text{O}_6^{3+}$  [ $M+3\text{H}_2\text{O}$ ] $^{3+}$  164.0706, found 164.0707.

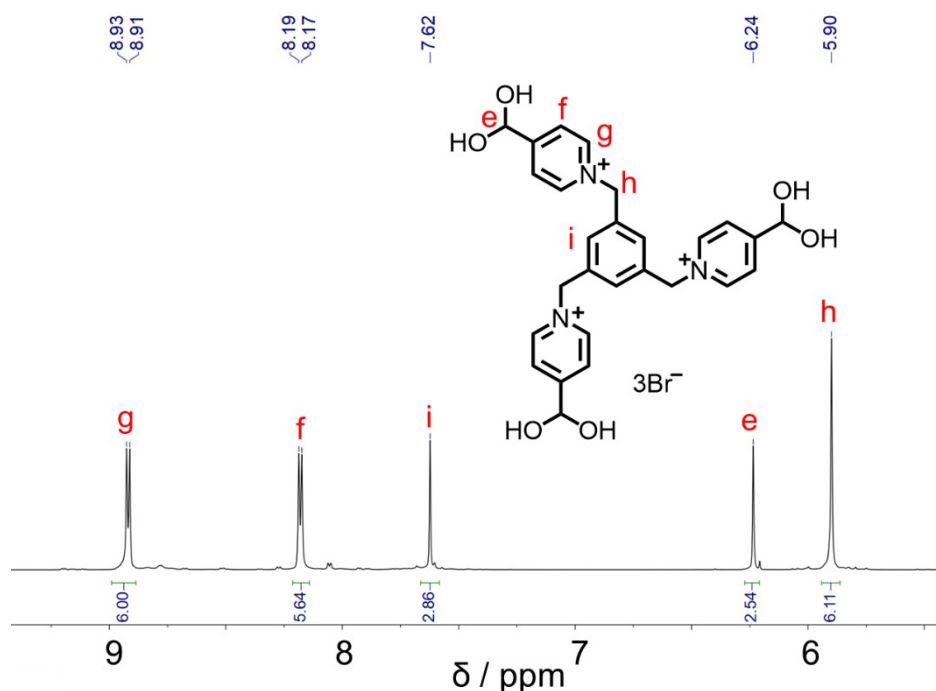

**Figure S1.**  $^1\text{H}$  NMR (500 MHz,  $\text{D}_2\text{O}$ , 298 K) spectrum of  $\mathbf{H}_1 \cdot 3\text{Br}$ .

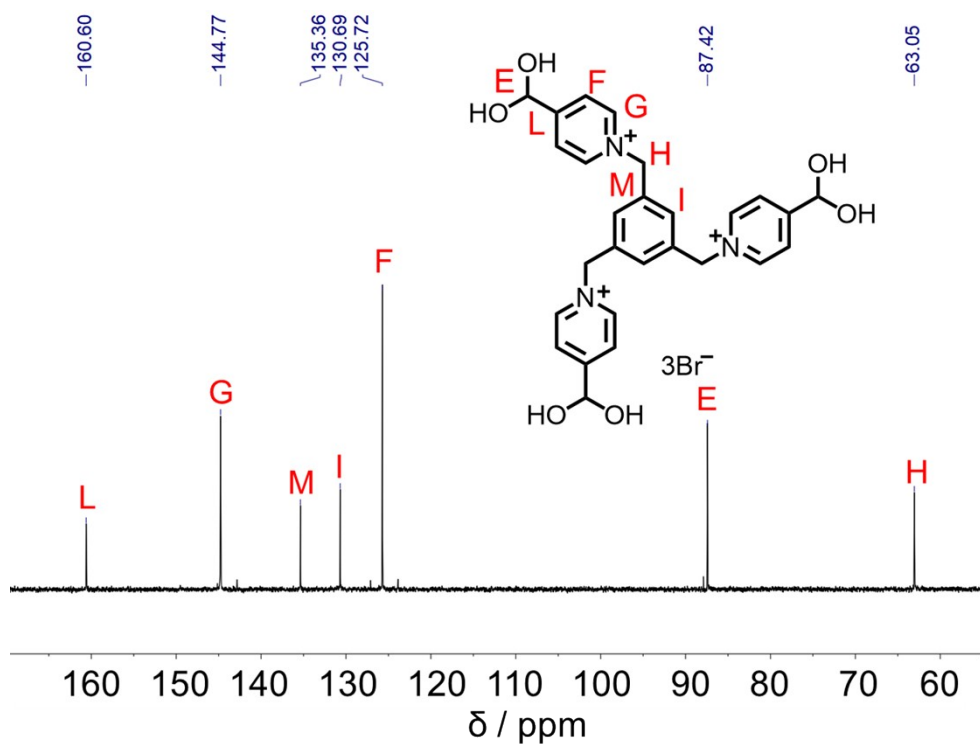

**Figure S2.**  $^{13}\text{C}$  NMR (125 MHz,  $\text{D}_2\text{O}$ , 298 K) spectrum of  $\text{H}_1 \cdot 3\text{Br}$ .

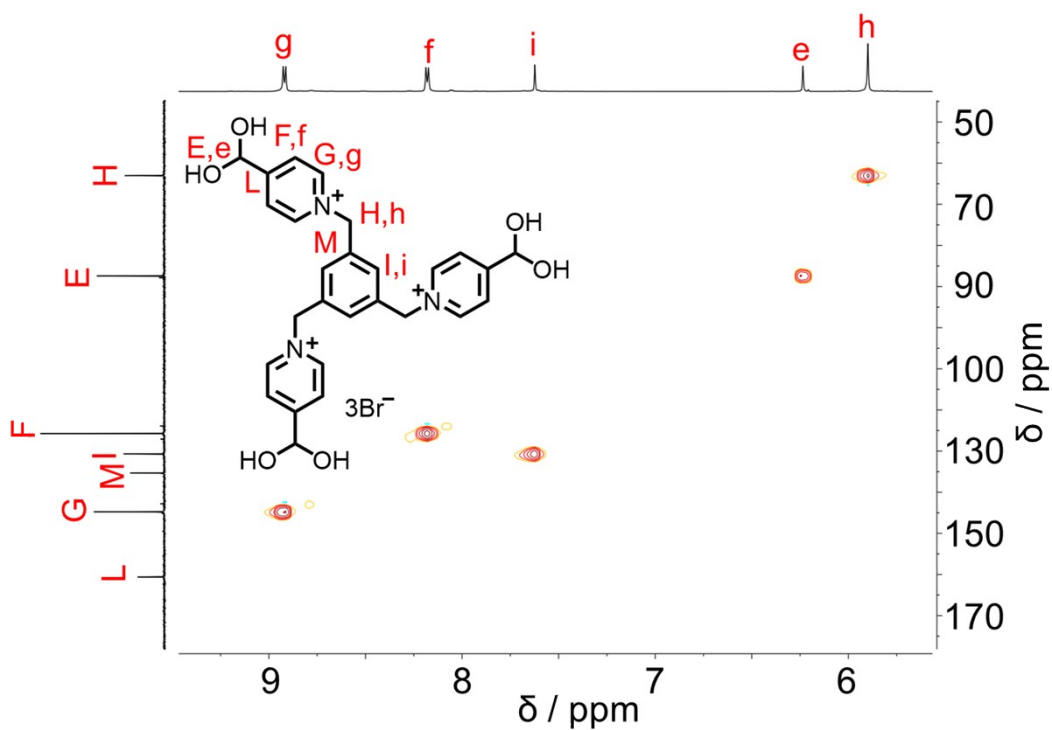

**Figure S3.**  $^1\text{H}$ - $^{13}\text{C}$  HSQC (500 and 125 MHz,  $\text{D}_2\text{O}$ , 298 K) spectrum of  $\text{H}_1 \cdot 3\text{Br}$ .

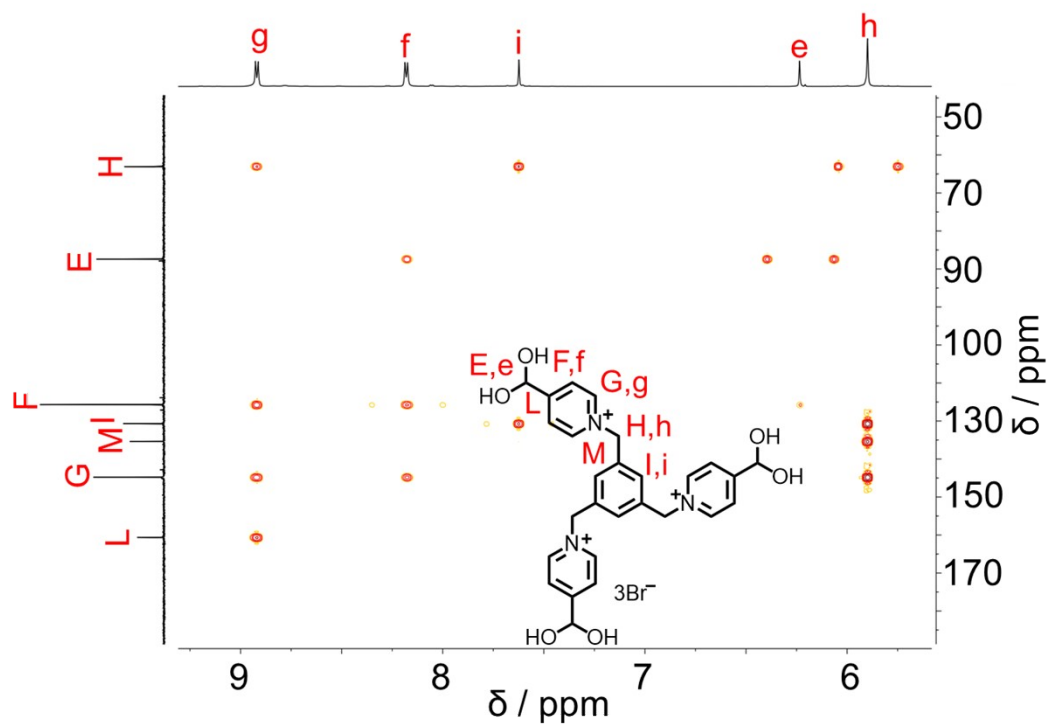

**Figure S4.**  $^1\text{H}$ - $^{13}\text{C}$  HMBC (500 and 125 MHz,  $\text{D}_2\text{O}$ , 298 K) spectrum of  $\text{H}_1 \cdot 3\text{Br}$ .

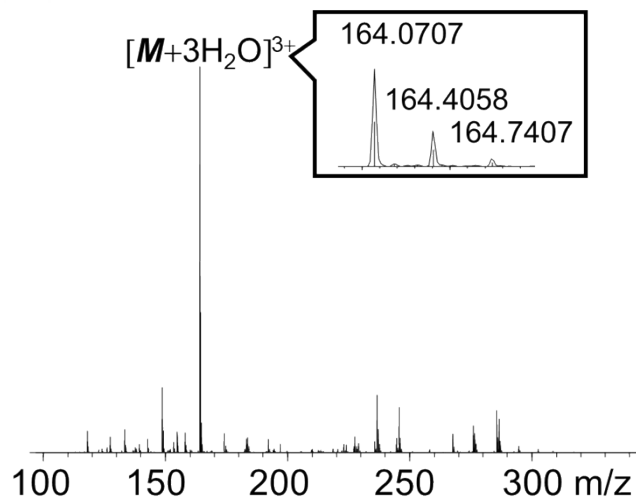

**Figure S5.** ESI-HRMS of  $\text{H}_1 \cdot 3\text{Br}$ .

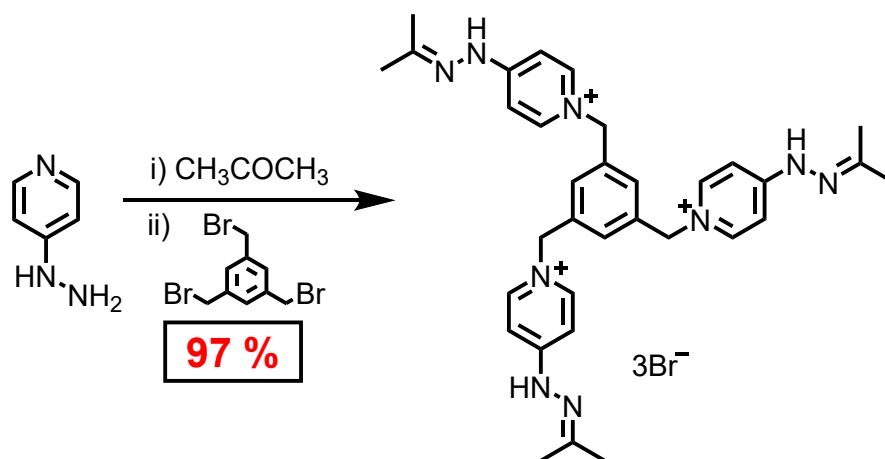

**Scheme S2.** Synthesis of  $\text{H}_2 \cdot 3\text{Br}$

$\text{H}_2 \cdot 3\text{Br}$ : A solution of 4-hydrazinopyridine (1.53g, 14.0 mmol) in 250 mL of acetone was heated at reflux for 1h. After this, 1,3,5-Tri(bromomethyl)benzene (500 mg, 1.4 mmol) was added to the reaction mixture and heated at reflux for 3 days. The obtained precipitate was filtrated upon cooling and washed with hot acetone ( $3 \times 20$  mL). The solvent was removed under reduce pressure to yielding virtually pure  $\text{H}_2 \cdot 3\text{Br}$  (1.09 g, 97 %) as a yellow powder.  $^1\text{H}$  NMR (500 MHz, DMSO)  $\delta$  (ppm): 11.09 (s, 3H), 8.47(dd,  $J = 25$  Hz,  $J = 5$  Hz, 6H), 7.43(s, 3H), 7.40(dd,  $J = 25$  Hz,  $J = 5$  Hz, 6H), 5.46(s, 6H), 2.06(d,  $J = 5$  Hz, 18H).  $^{13}\text{C}$  NMR (125 MHz, DMSO)  $\delta$  (ppm): 167.59, 154.24, 143.98, 142.68, 137.13, 127.89, 108.99, 106.91, 59.20, 25.20, 18.22. **HRMS (ESI)**:  $m/z$  calculated for  $\text{C}_{33}\text{H}_{42}\text{N}_9^{3+}$  [ $M$ ] $^{3+}$  188.1182, found 188.1155; calculated for  $\text{C}_{33}\text{H}_{41}\text{N}_9^{2+}$  [ $M-\text{H}$ ] $^{2+}$  281.6737, found 281.6727; calculated for  $\text{C}_{33}\text{H}_{40}\text{N}_9^+$  [ $M-2\text{H}$ ] $^+$  562.3401, found 562.3419.

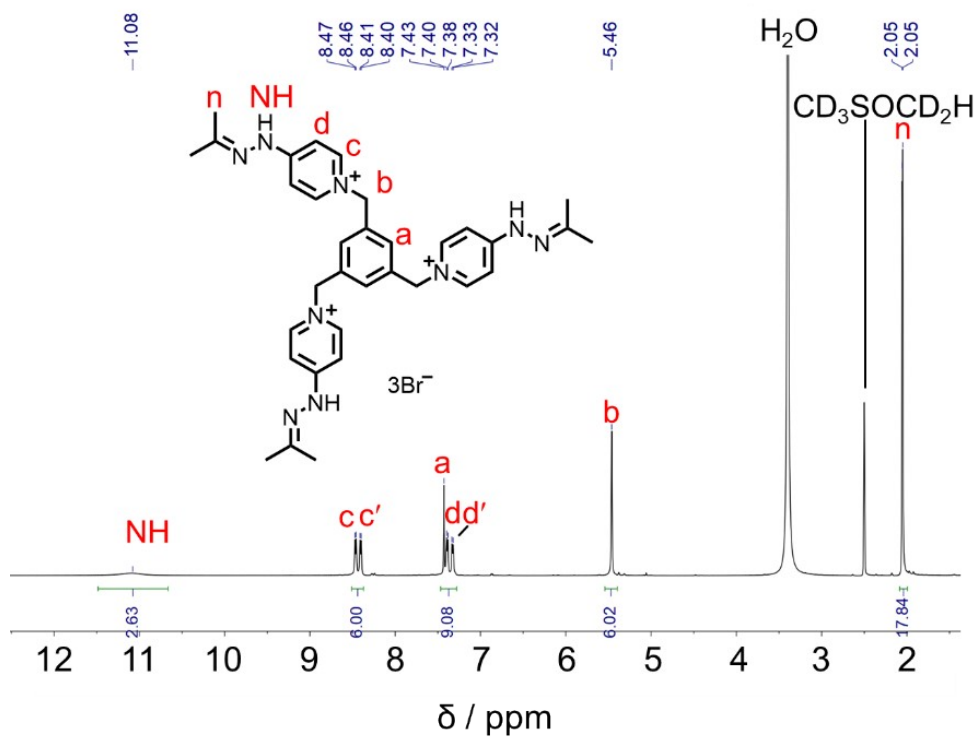

**Figure S6.** <sup>1</sup>H NMR (500 MHz, DMSO, 298 K) spectrum of  $\text{H}_2 \cdot 3\text{Br}^-$ .

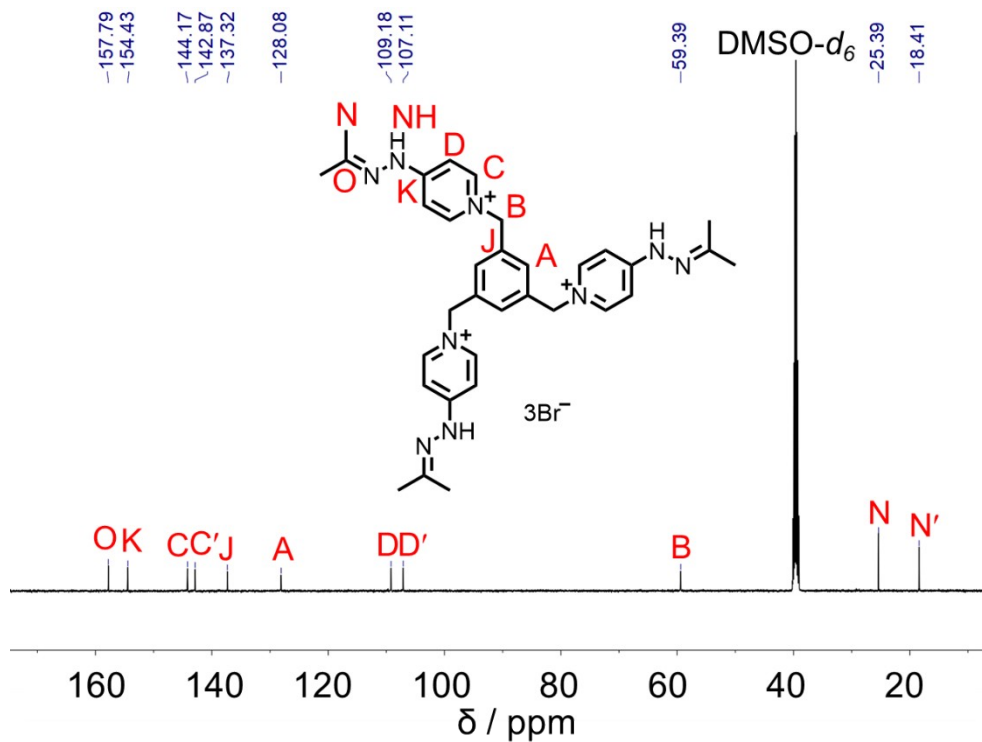

**Figure S7.** <sup>13</sup>C NMR (125 MHz, DMSO, 298 K) spectrum of  $\text{H}_2 \cdot 3\text{Br}^-$ .

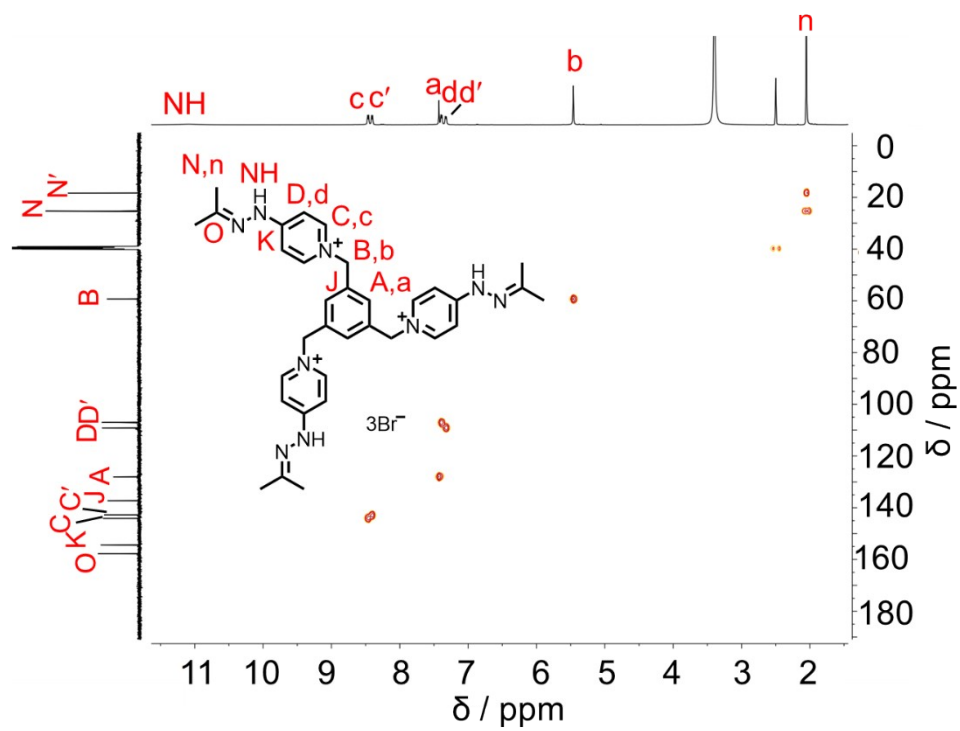

**Figure S8.**  $^1\text{H}$ - $^{13}\text{C}$  HSQC (500 and 125 MHz, DMSO, 298 K) spectrum of  $\text{H}_2 \cdot 3\text{Br}$ .

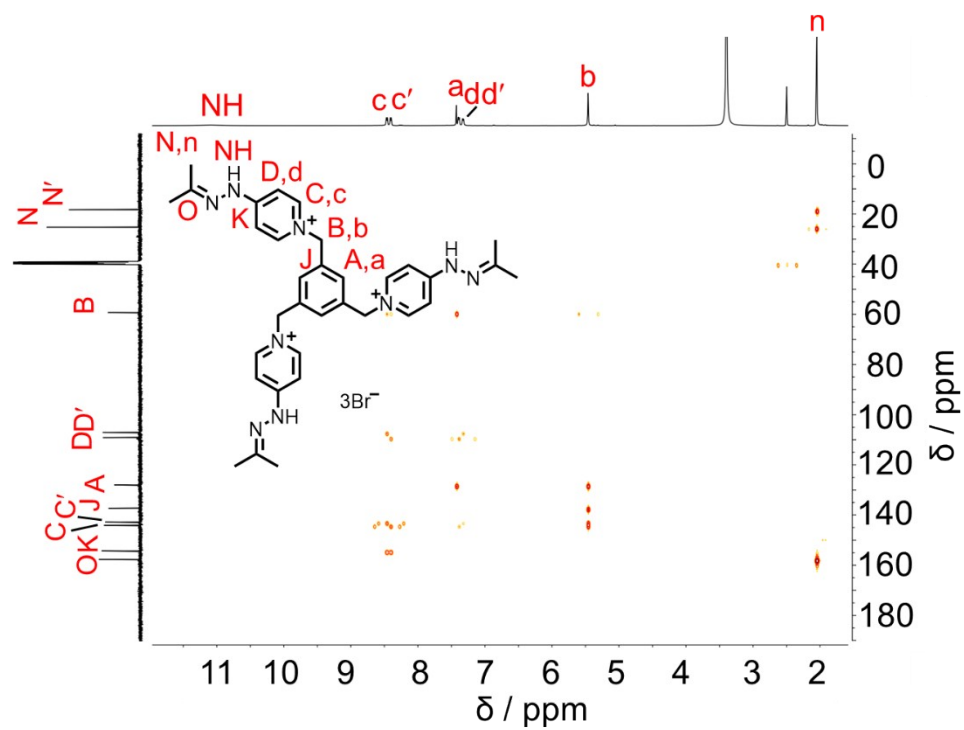

**Figure S9.**  $^1\text{H}$ - $^{13}\text{C}$  HMBC (500 and 125 MHz, DMSO, 298 K) spectrum of  $\text{H}_2 \cdot 3\text{Br}$ .

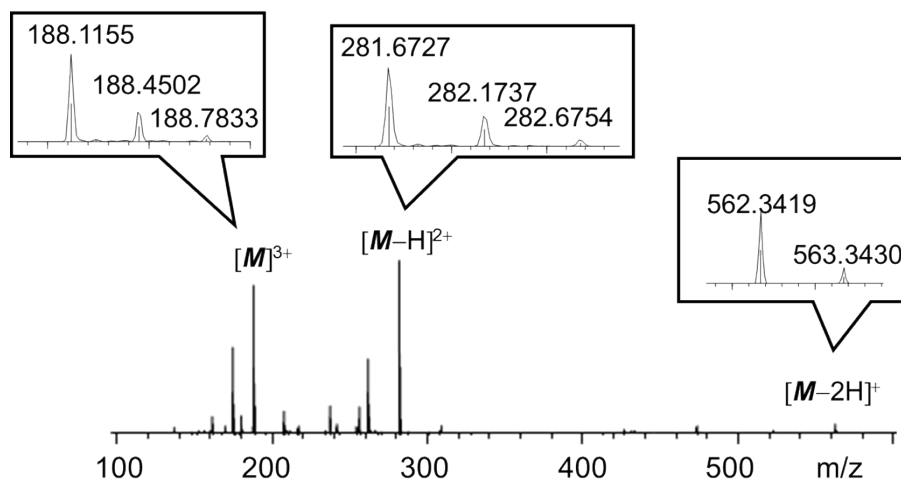

**Figure S10.** ESI-HRMS of  $\text{H}_2 \cdot 3\text{Br}$ .

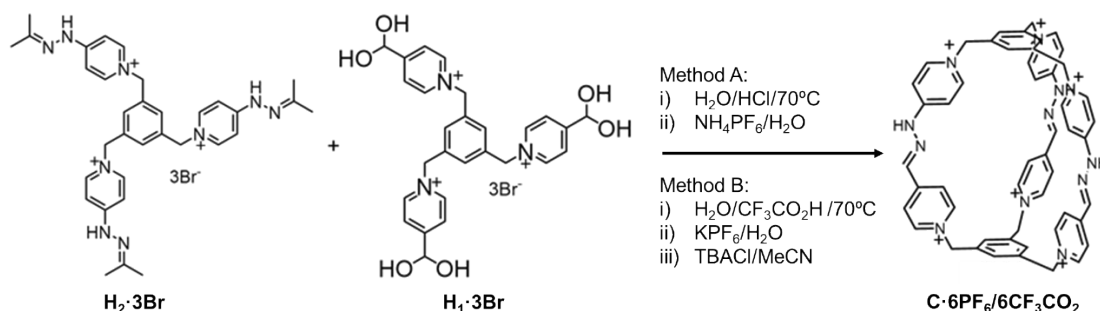

**Scheme S3.** Synthesis of  $\text{C}^{6+}$ .

#### Method A:

**C·6PF<sub>6</sub>:** A solution of  $\text{H}_1 \cdot 3\text{Br}$  (82 mg, 0.12 mmol),  $\text{H}_2 \cdot 3\text{Br}$  (100 mg, 0.12 mmol) and 1 mL of concentrated HCl in 50 mL of water was heated at 70 °C for 12 h. After cooling, excess of  $\text{NH}_4\text{PF}_6$  was added until no further precipitation was observed. The obtained solid was filtrated and washed with water ( $3 \times 10$  mL). The crude sample was purified by flash column chromatography ( $\text{H}_2\text{O}/\text{methanol}/\text{nitromethane}$  (12:7:1); 200-300 mesh), followed by counteranoin exchange, yielding the pure **C·6PF<sub>6</sub>** (110 mg, 52%) as a reddish solid.

$^1\text{H}$  NMR (500 MHz,  $\text{CD}_3\text{CN}$ )  $\delta$  (ppm) 8.44 (d,  $J = 5.5$  Hz, 3H), 8.40 (d,  $J = 7.0$  Hz, 6H), 8.31 (d,  $J = 7.0$  Hz, 6H), 8.22 (s, 3H), 7.93 (d,  $J = 5.5$  Hz, 3H), 7.80 (s, 3H), 7.68 (s, 3H), 7.56 (d,  $J = 6.5$  Hz, 3H), 7.27 (d,  $J = 7.5$  Hz, 3H), 5.69 (s, 6H), 5.44 (s, 6H).  $^{13}\text{C}$  NMR (100 MHz,  $\text{CD}_3\text{CN}$ )  $\delta$  (ppm): 156.16, 151.23, 145.57, 145.03, 143.29, 140.85, 136.47, 135.82, 135.78, 134.91, 125.91, 111.56, 111.36, 63.59, 61.56. HRMS (ESI):  $m/z$  calculated for  $\text{C}_{51}\text{H}_{47}\text{F}_6\text{N}_{12}\text{P}^{4+}$  [ $M\text{-H}+\text{PF}_6$ ] $^{4+}$  243.0917, found 243.0881;  $\text{C}_{51}\text{H}_{46}\text{F}_6\text{N}_{12}\text{P}^{3+}$  [ $M\text{-2H}+\text{PF}_6$ ] $^{3+}$  323.1786, found 323.7861;  $\text{C}_{51}\text{H}_{48}\text{F}_{18}\text{N}_{12}\text{P}_3^{3+}$  [ $M+3\text{PF}_6$ ] $^{3+}$  421.1011, found 421.1026;  $\text{C}_{51}\text{H}_{45}\text{F}_6\text{N}_{12}\text{P}^{3+}$  [ $M\text{-3H}+\text{PF}_6$ ] $^{3+}$  485.1760, found 485.1722.

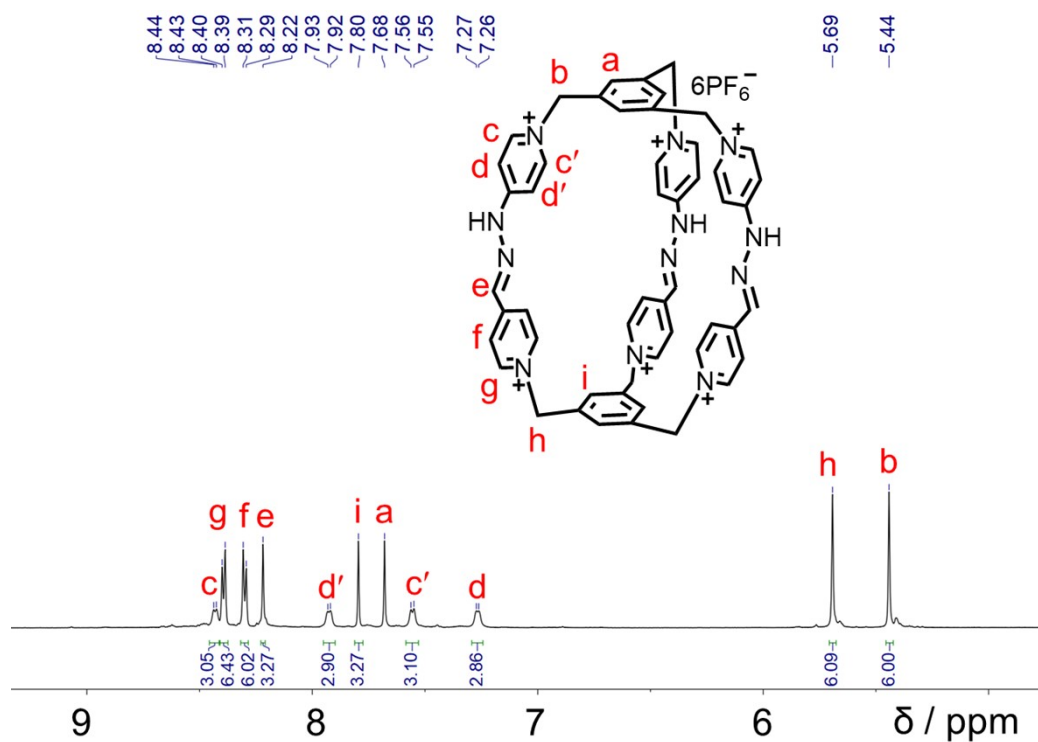

**Figure S11.** <sup>1</sup>H NMR (500 MHz, CD<sub>3</sub>CN, 298 K) spectrum of **C**·6PF<sub>6</sub>.

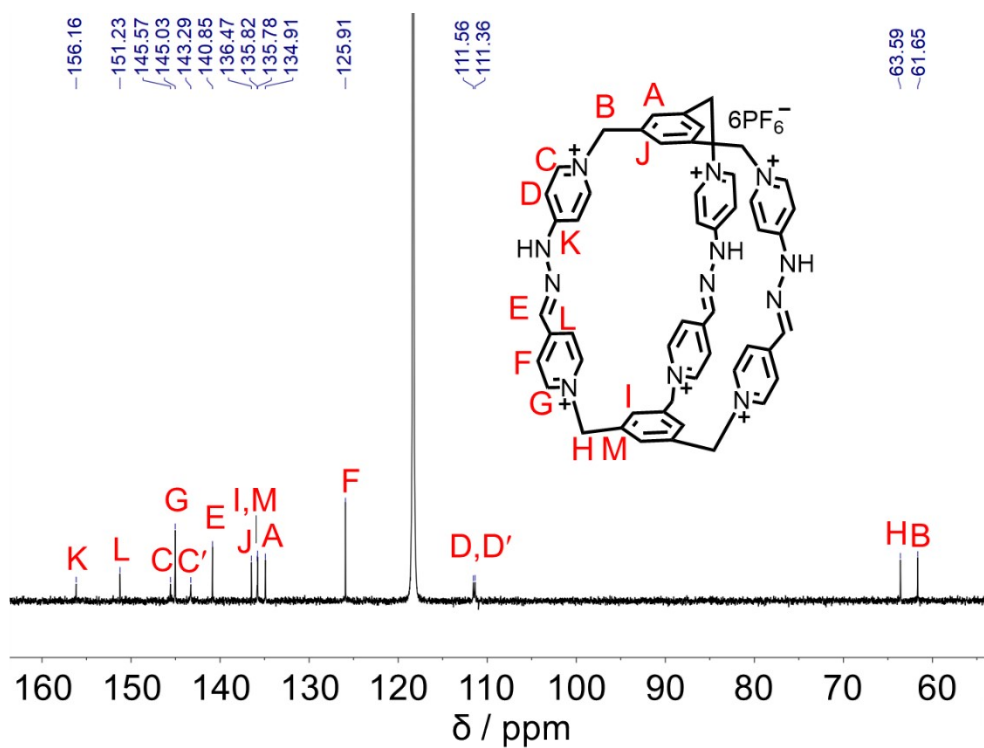

**Figure S12.** <sup>13</sup>C NMR (500 MHz, CD<sub>3</sub>CN, 298 K) spectrum of **C**·6PF<sub>6</sub>.

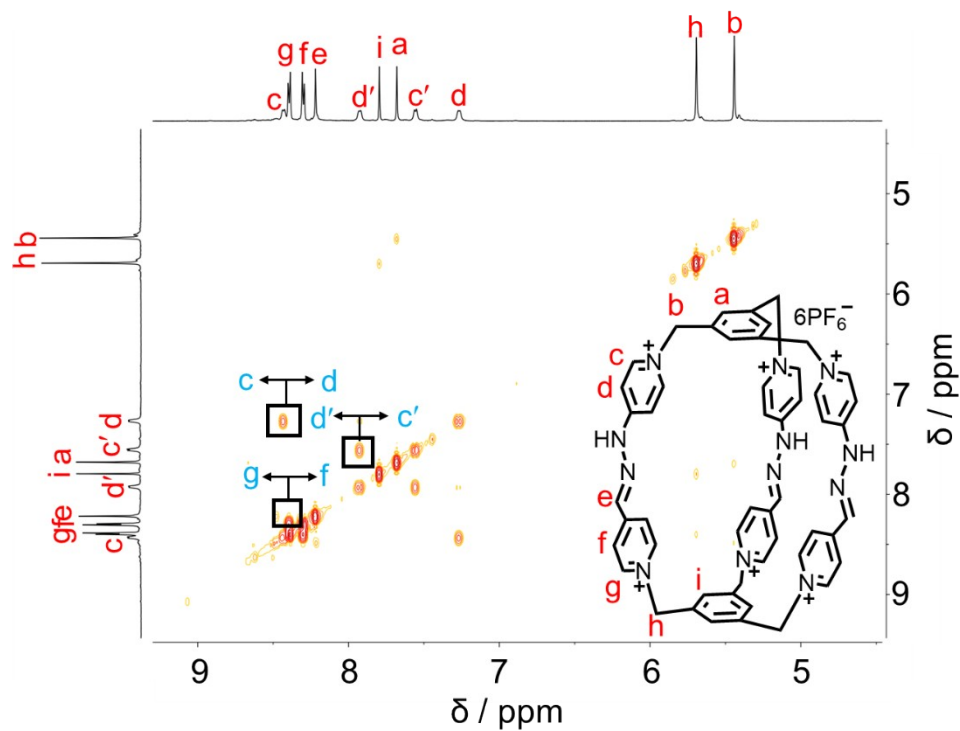

**Figure S13.**  $^1\text{H}$ - $^1\text{H}$  COSY (500 MHz,  $\text{CD}_3\text{CN}$ , 298 K) spectrum of  $\text{C} \cdot 6\text{PF}_6$ . Key correlation peak is labeled in the spectrum.

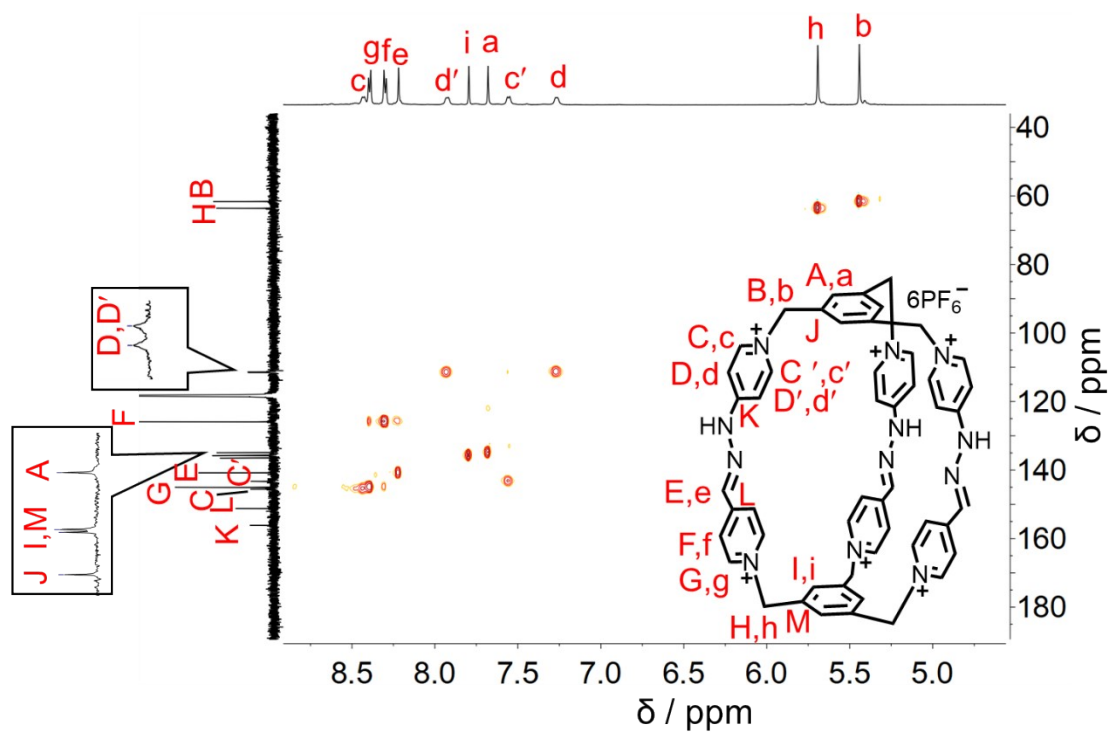

**Figure S14.**  $^1\text{H}$ - $^{13}\text{C}$  HSQC (500 and 125 MHz,  $\text{DMSO}$ , 298 K) spectrum of  $\text{C} \cdot 6\text{PF}_6$ .

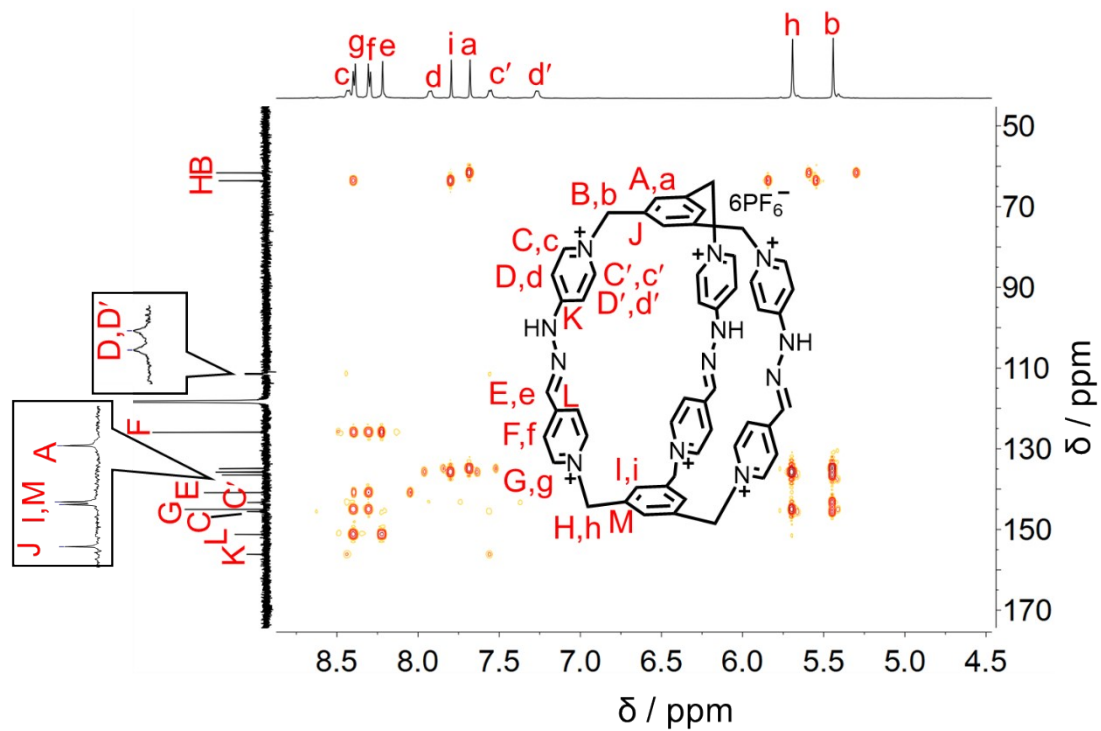

**Figure S15.**  $^1\text{H}$ - $^{13}\text{C}$  HMBC (500 and 125 MHz, DMSO, 298 K) spectrum of  $\text{C}\cdot 6\text{PF}_6$ .

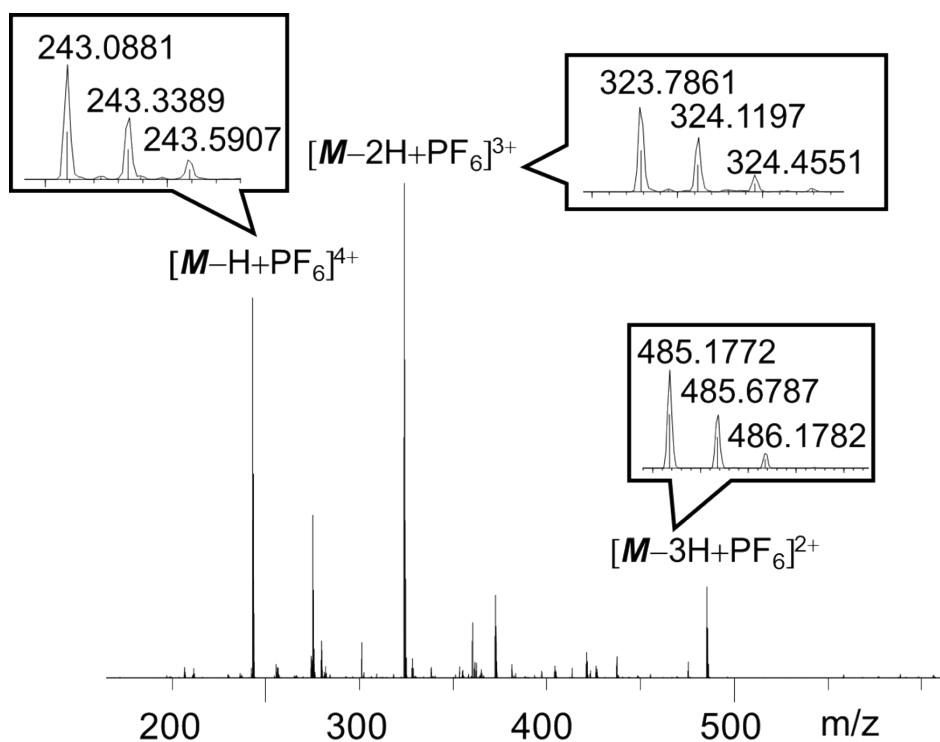

**Figure S16.** ESI-HRMS of  $\text{C}\cdot 6\text{PF}_6$ .

**C**·6Cl could be obtained via counteranion exchange, which was accomplished by adding either TBACl into the solution of **C**·6PF<sub>6</sub> in acetonitrile, followed by filtration to collect the corresponding precipitates. <sup>1</sup>H NMR (500 MHz, D<sub>2</sub>O, 298K) δ (ppm) 8.67 (d, *J* = 5 Hz, 6H), 8.61 (s, 3H), 8.26 (d, *J* = 5 Hz, 6H), 8.24 (s, 3H), 7.91 (s, 3H), 7.77 (s, 6H), 7.75 (s, 3H), 7.22 (s, 3H), 5.86 (s, 6H), 5.55 (s, 6H). HRMS (ESI): *m/z* calculated for C<sub>51</sub>H<sub>46</sub>N<sub>12</sub><sup>4+</sup> [*M*-2H]<sup>4+</sup> 206.5987, found 206.5965; C<sub>51</sub>H<sub>45</sub>N<sub>12</sub><sup>3+</sup> [*M*-3H]<sup>3+</sup> 275.1291, found 275.1261.

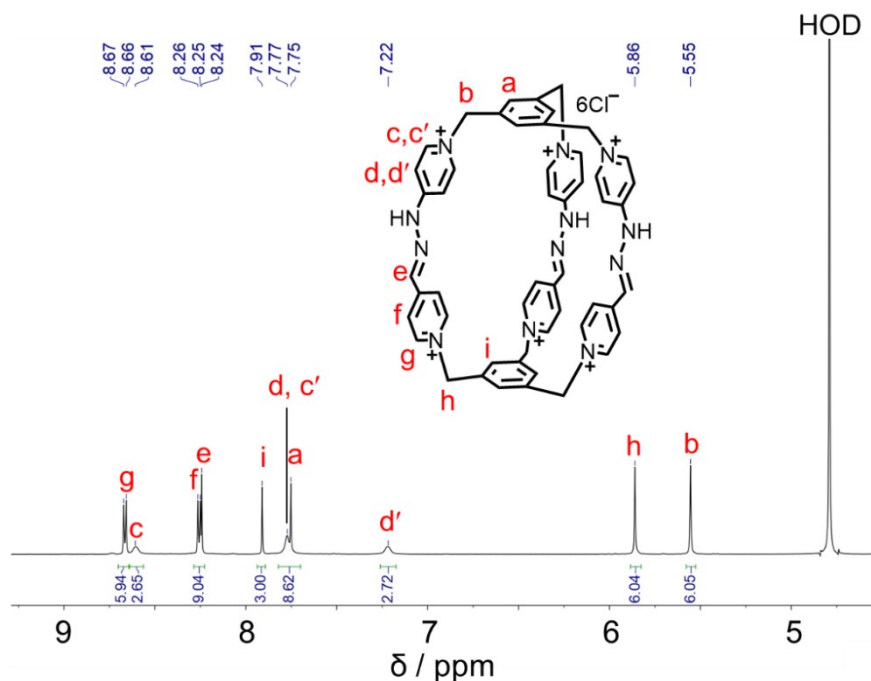

**Figure S17.** <sup>1</sup>H NMR (500 MHz, D<sub>2</sub>O, 298 K) spectrum of **C**·6Cl

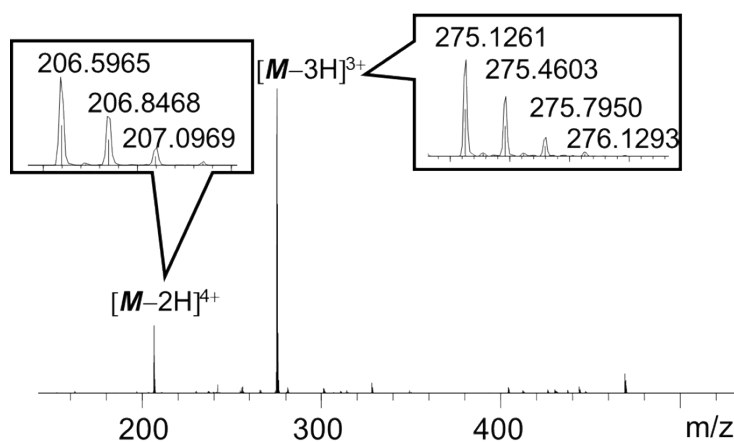

**Figure S18.** ESI-HRMS of **C**·6Cl.

## Method B:

$\text{H}_1\cdot 3\text{Br}$  (376 mg, 0.51 mmol) and  $\text{H}_2\cdot 3\text{Br}$  (413 mg, 0.51 mmol) were dissolved in  $\text{H}_2\text{O}$  (180 mL, 2.8 mM). TFA (4  $\mu\text{L}$ , 0.05 mmol) was added. The solution was stirred and heated at 70  $^\circ\text{C}$  for 24 h. After cooling, excess of  $\text{KPF}_6$  was added until no more precipitate was formed. The solid was filtered and washed with  $\text{H}_2\text{O}$  and  $\text{Et}_2\text{O}$ . The solid was redissolved in MeCN and an excess of TBACl was added until no more precipitate was formed. The solid was washed with MeCN and  $\text{Et}_2\text{O}$ .

A fraction of the solid (51.1 mg) was dissolved in  $\text{H}_2\text{O}:\text{MeCN}$  2:1 and purified by reverse-phase semipreparative HPLC (A:  $\text{H}_2\text{O}$  + 0.1% TFA, B: MeCN + 0.1% TFA), giving a yellowish solid (35.5 mg, 48%,  $\text{C}\cdot 6\text{CF}_3\text{CO}_2$ ).

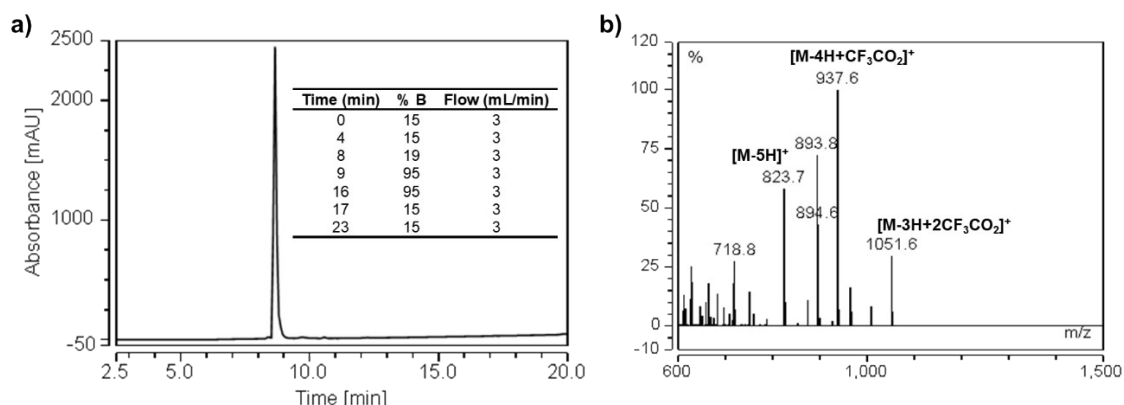

**Figure S19.** a) HPLC chromatogram (200 nm) of purified  $\text{C}^{6+}$  with  $t_r = 8.8$  min. (Inset) Purification method. b) MS spectrum from the chromatographic peak at  $t_r = 8.8$  min.

- $\text{C}\cdot 6\text{CF}_3\text{CO}_2$  characterization at  $\text{pD} = 2$  ( $\text{NaH}_2\text{PO}_4/\text{H}_3\text{PO}_4$  buffer) in  $\text{D}_2\text{O}$  by NMR and HRMS:

$^1\text{H}$  NMR (500 MHz,  $\text{D}_2\text{O}$ )  $\delta$  (ppm): 8.62 (d,  $J = 6.5$  Hz, 6H), 8.56 (d,  $J = 7.1$  Hz, 3H), 8.15 (s, 3H), 8.11 (d,  $J = 6.4$  Hz, 6H), 7.79 (s, 3H), 7.74 (d,  $J = 7.3$  Hz, 3H), 7.63 (s, 3H), 7.59 – 7.54 (m, 3H), 7.15 (d,  $J = 7.0$  Hz, 3H), 5.77 (s, 6H), 5.47 (s, 6H).  $^{13}\text{C}$  NMR (126 MHz,  $\text{D}_2\text{O}$ )  $\delta$  (ppm): 154.48, 150.08, 144.11, 143.99, 142.54, 140.15, 136.48, 135.91, 132.49, 131.65, 110.20, 109.92, 62.89, 60.89. HRMS (ESI):  $m/z$  calculated for  $\text{C}_{52}\text{H}_{45}\text{F}_3\text{N}_{12}\text{O}_2^{2+}$   $[\text{M}-3\text{H}+\text{CF}_3\text{CO}_2]^{2+}$  469.1865, found 469.1864;  $\text{C}_{51}\text{H}_{45}\text{N}_{12}^{3+}$   $[\text{M}-3\text{H}]^{3+}$  275.1291, found 275.1289;  $\text{C}_{51}\text{H}_{44}\text{N}_{12}^{3+}$   $[\text{M}-4\text{H}]^{3+}$  412.1900, found 412.1900

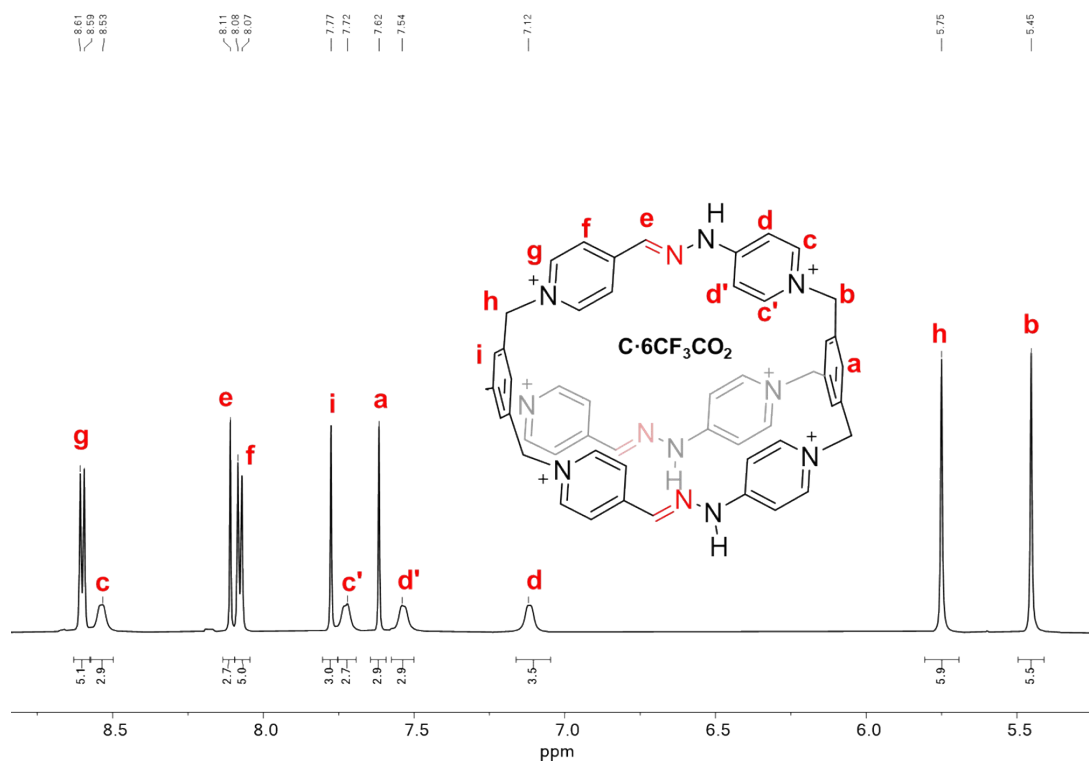

**Figure S20.** <sup>1</sup>H NMR (500 MHz, D<sub>2</sub>O, 298 K) spectrum of **C·6CF<sub>3</sub>CO<sub>2</sub>**.

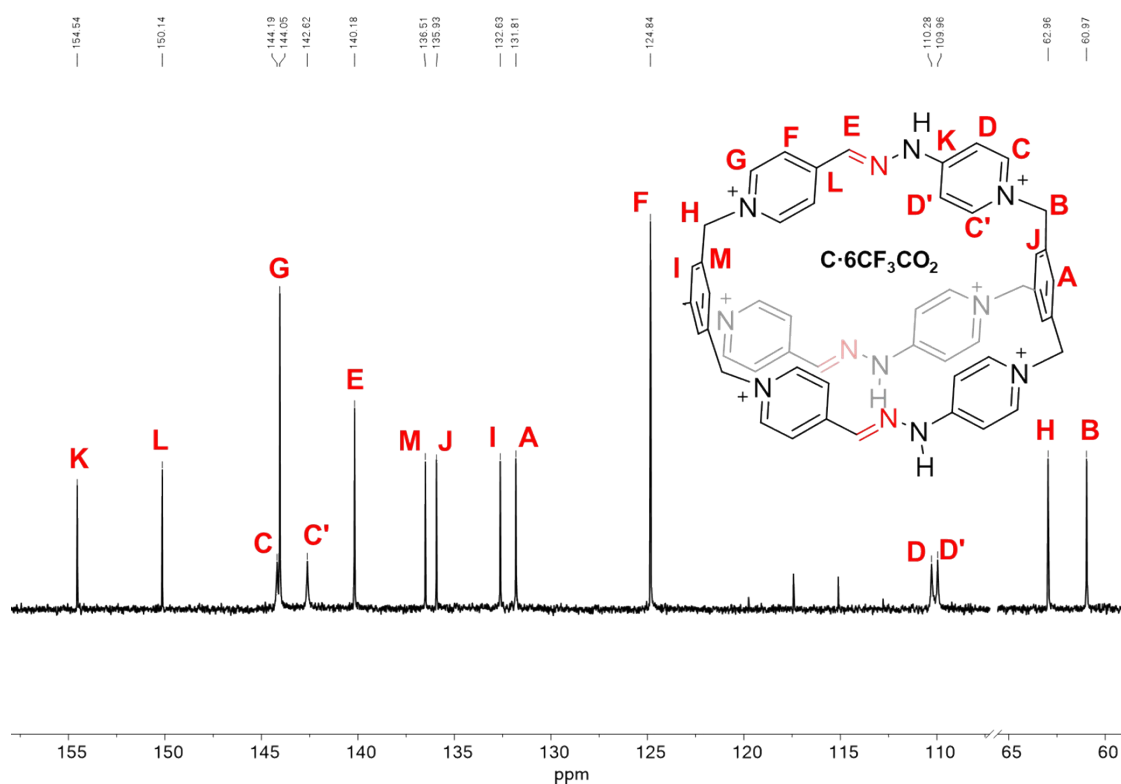

**Figure S21.** <sup>13</sup>C NMR (125 MHz, D<sub>2</sub>O, 298 K) spectrum of **C·6CF<sub>3</sub>CO<sub>2</sub>**.

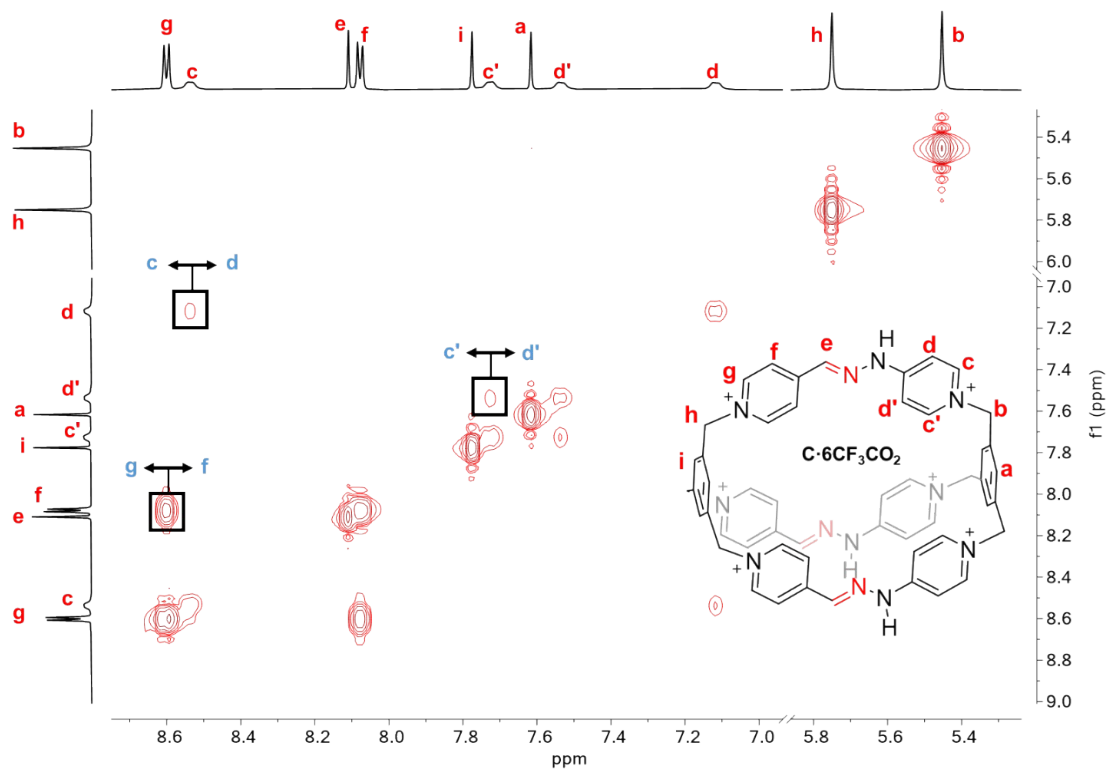

**Figure S22.**  $^1\text{H}$ - $^1\text{H}$  COSY (500 MHz,  $\text{D}_2\text{O}$ , 298 K) spectrum of  $\text{C}\cdot 6\text{CF}_3\text{CO}_2$ . Key correlation peak is labeled in the spectrum.

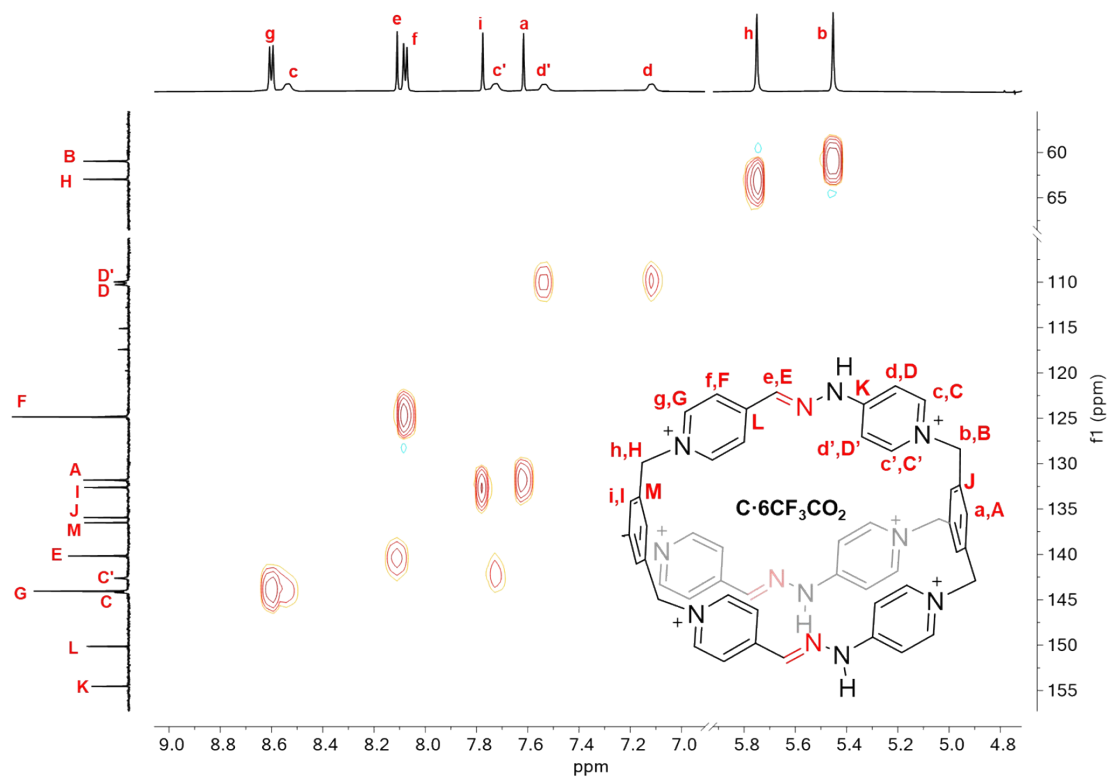

**Figure S23.**  $^1\text{H}$ - $^{13}\text{C}$  HSQC (500 and 125 MHz,  $\text{D}_2\text{O}$ , 298 K) spectrum of  $\text{C}\cdot 6\text{CF}_3\text{CO}_2$ .

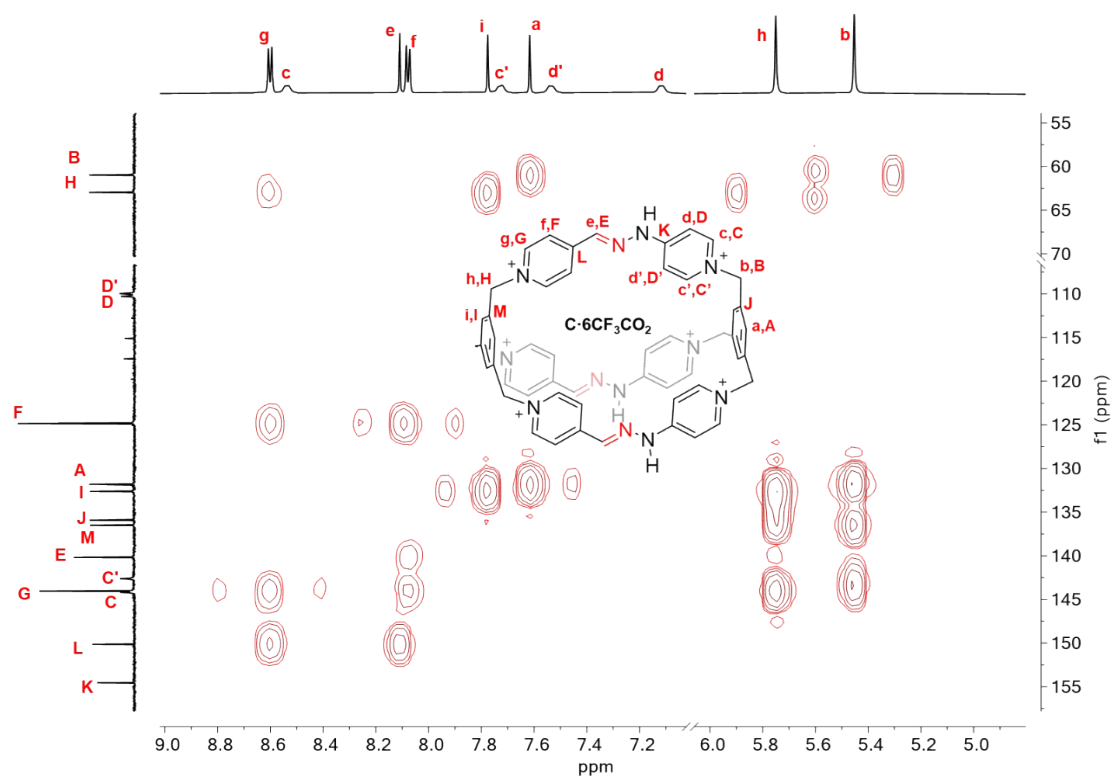

**Figure S24.**  $^1\text{H}$ - $^{13}\text{C}$  HMBC (500 and 125 MHz,  $\text{D}_2\text{O}$ , 298 K) spectrum of  $\text{C}\cdot 6\text{CF}_3\text{CO}_2$ .

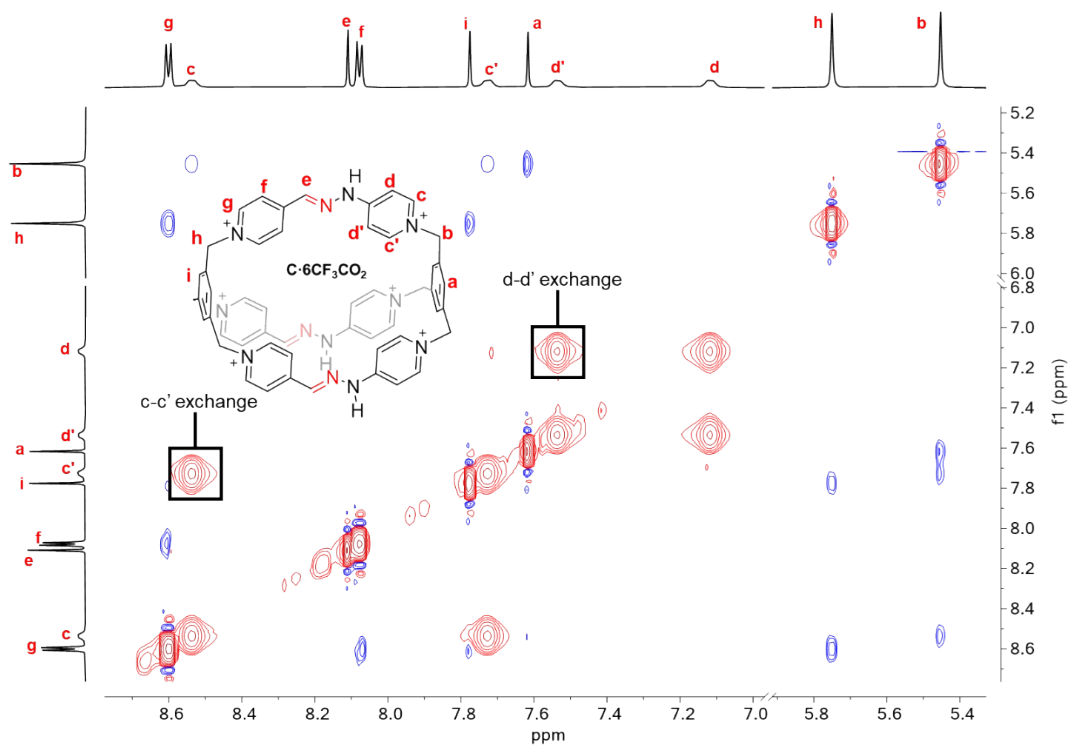

**Figure S25.**  $^1\text{H}$ - $^1\text{H}$  NOESY (500 MHz,  $\text{D}_2\text{O}$ , 298 K) spectrum of  $\text{C}\cdot 6\text{CF}_3\text{CO}_2$ . Exchange cross-peak is labeled in the spectrum.

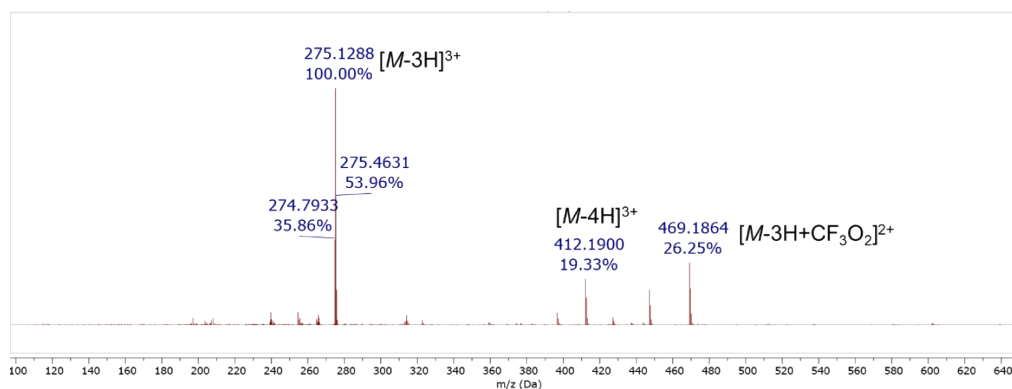

**Figure S26.** ESI-HRMS of **C·6CF<sub>3</sub>CO<sub>2</sub>**.

- **C·3CF<sub>3</sub>CO<sub>2</sub>** characterization at pD = 12 (Na<sub>3</sub>PO<sub>4</sub>/Na<sub>2</sub>HPO<sub>4</sub> buffer) in D<sub>2</sub>O by NMR:  
<sup>1</sup>H NMR (500 MHz, D<sub>2</sub>O) δ (ppm): 8.36 (d, *J* = 7.1 Hz, 1H), 8.03 (s, 1H), 8.00 (d, *J* = 7.2 Hz, 1H), 7.91 (d, *J* = 5.6 Hz, 1H), 7.64 (s, 1H), 7.43 (s, 1H), 7.22 (s, 1H), 7.17 (d, *J* = 7.6 Hz, 1H), 6.68 (d, *J* = 7.1 Hz, 1H), 5.61 (s, 1H), 5.13 (s, 1H). <sup>13</sup>C NMR (126 MHz, D<sub>2</sub>O) δ (ppm): 164.34, 152.30, 142.75, 141.54, 139.99, 139.32, 137.78, 137.03, 130.84, 129.41, 122.93, 113.03, 109.25, 62.26, 59.58.

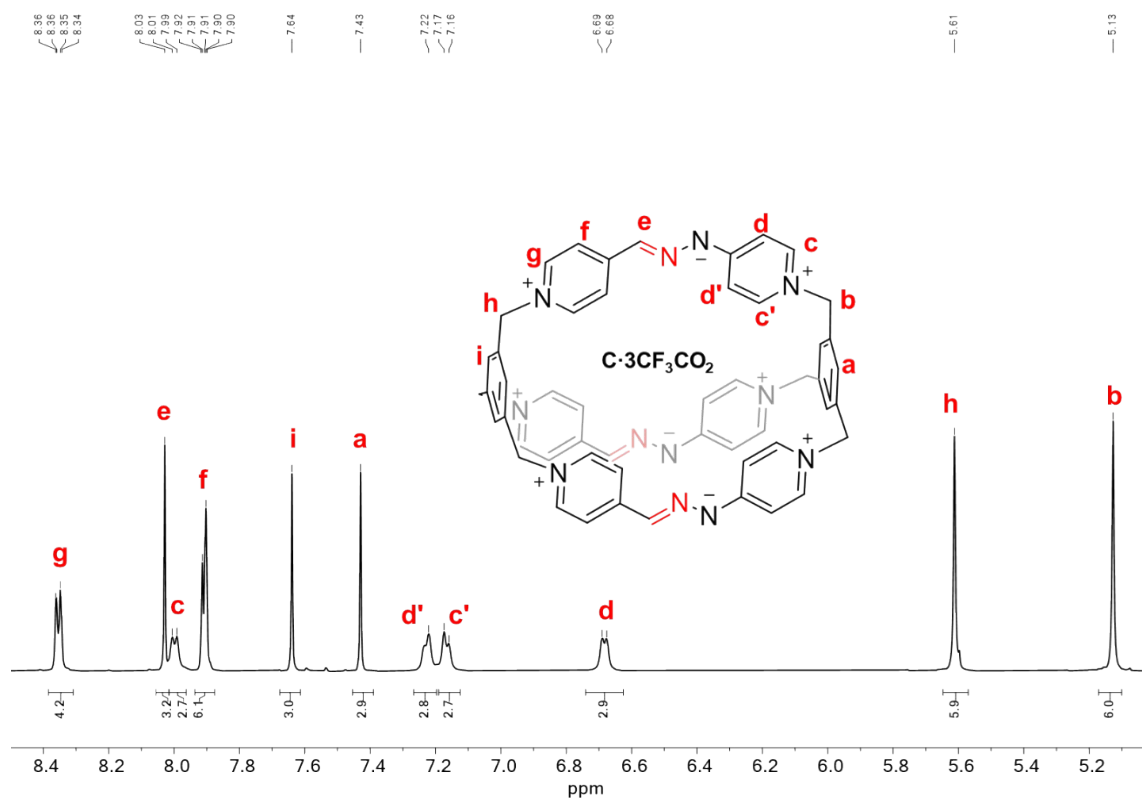

**Figure S27.** <sup>1</sup>H NMR (500 MHz, D<sub>2</sub>O, 298 K) spectrum of **C·3CF<sub>3</sub>CO<sub>2</sub>**.

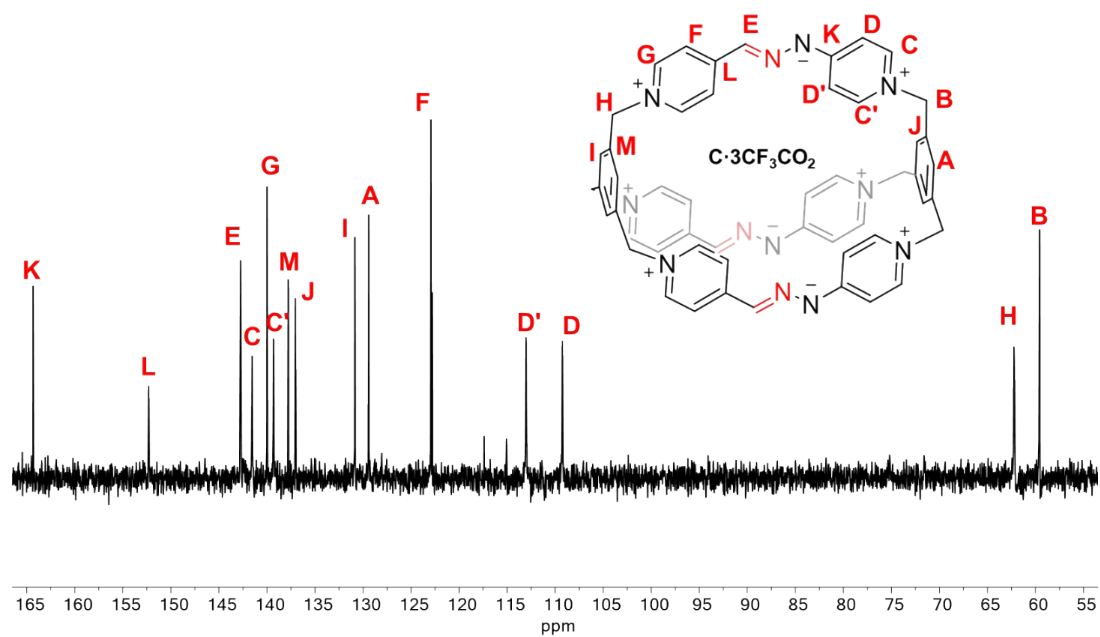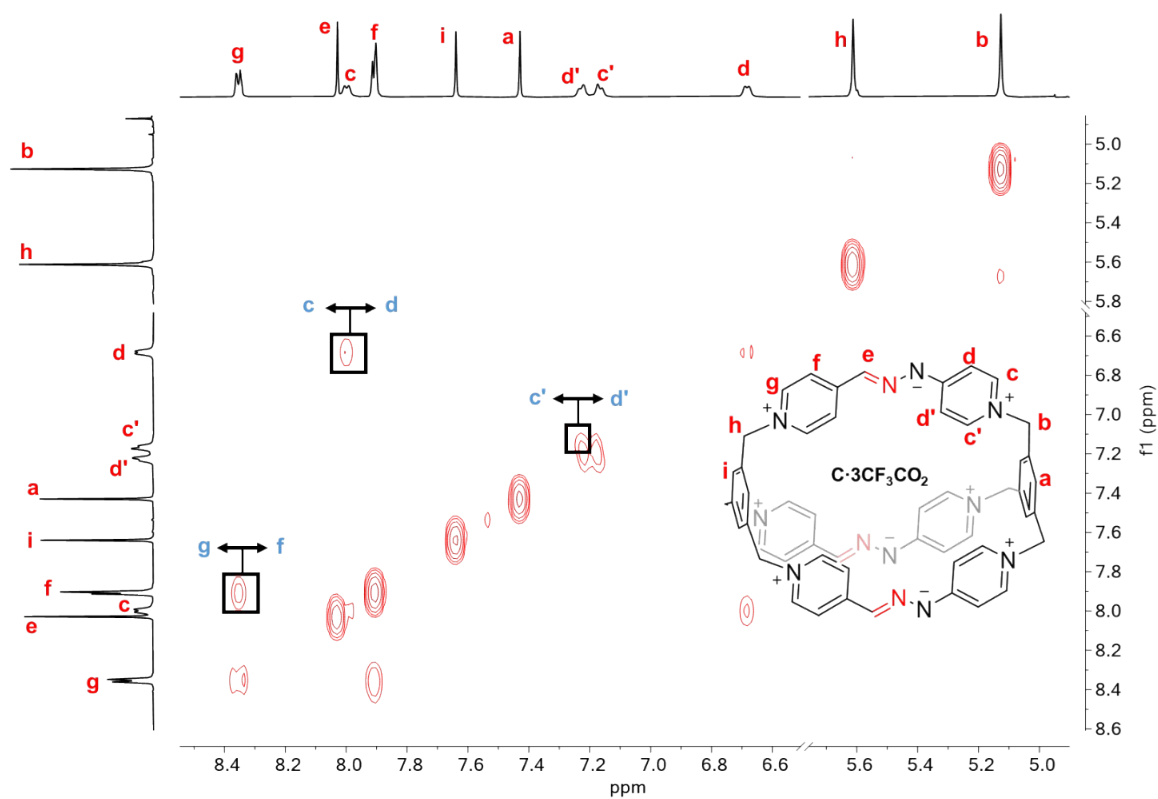

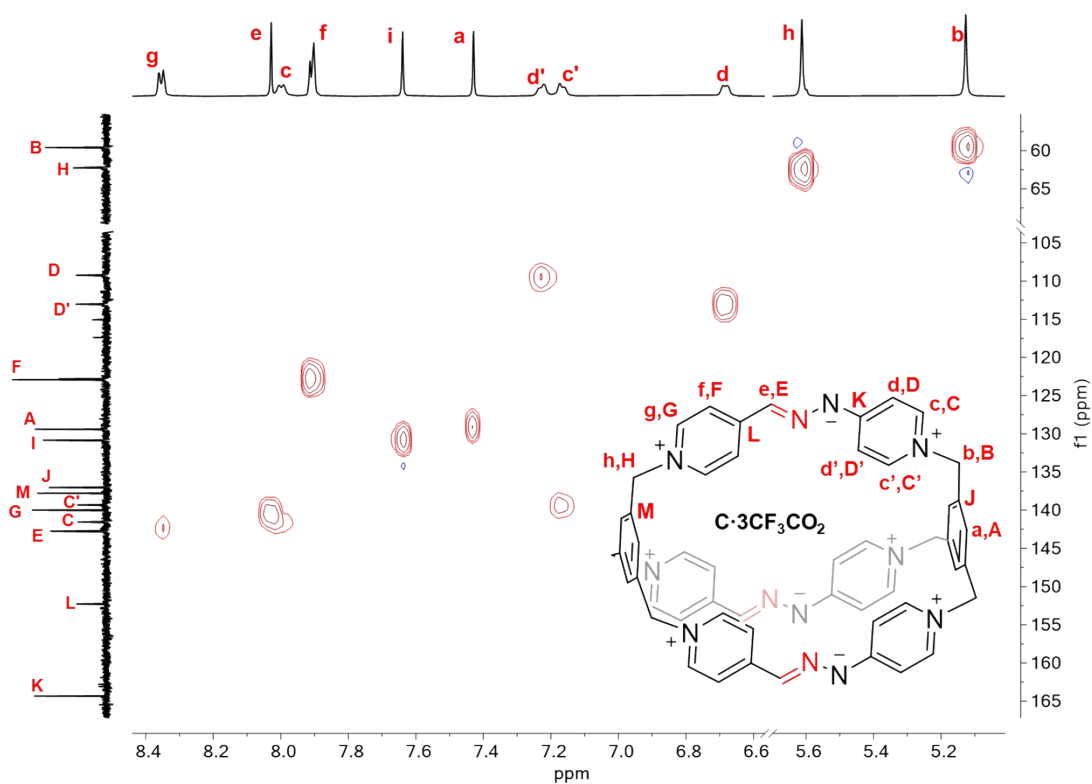

**Figure S30.**  $^1\text{H}$ - $^{13}\text{C}$  HSQC (500 and 125 MHz,  $\text{D}_2\text{O}$ , 298 K) spectrum of  $\text{C}\cdot 3\text{CF}_3\text{CO}_2$ .

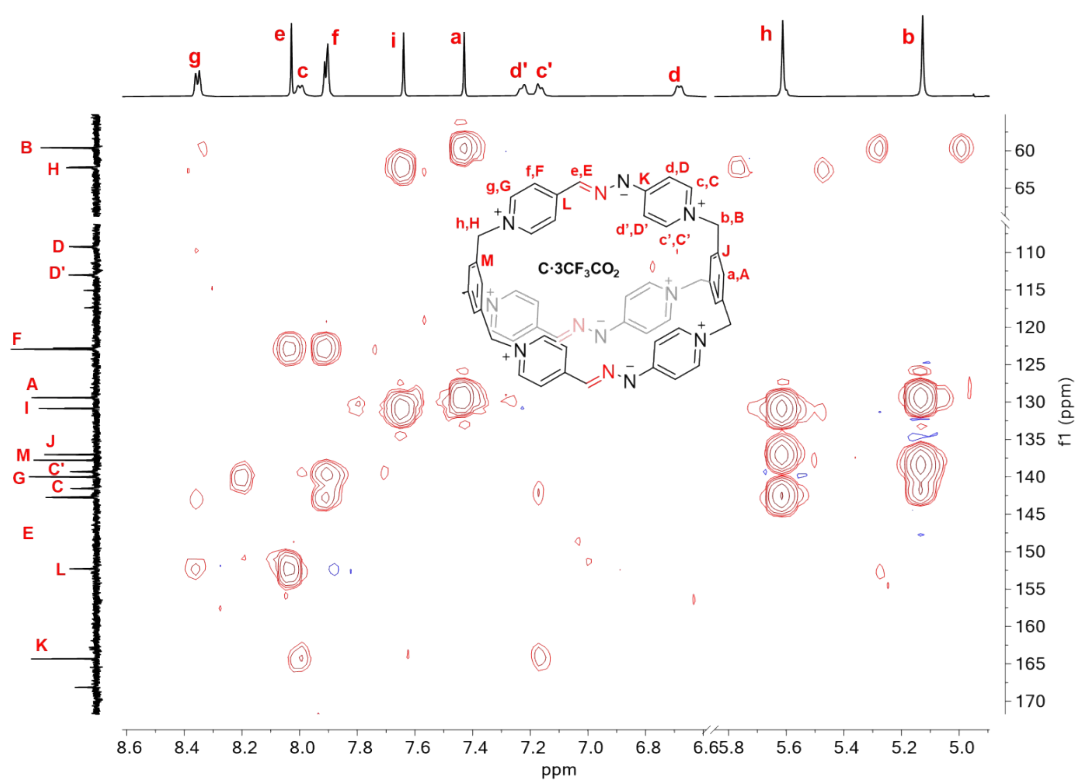

**Figure S31.**  $^1\text{H}$ - $^{13}\text{C}$  HMBC (500 and 125 MHz,  $\text{D}_2\text{O}$ , 298 K) spectrum of  $\text{C}\cdot 3\text{CF}_3\text{CO}_2$ .

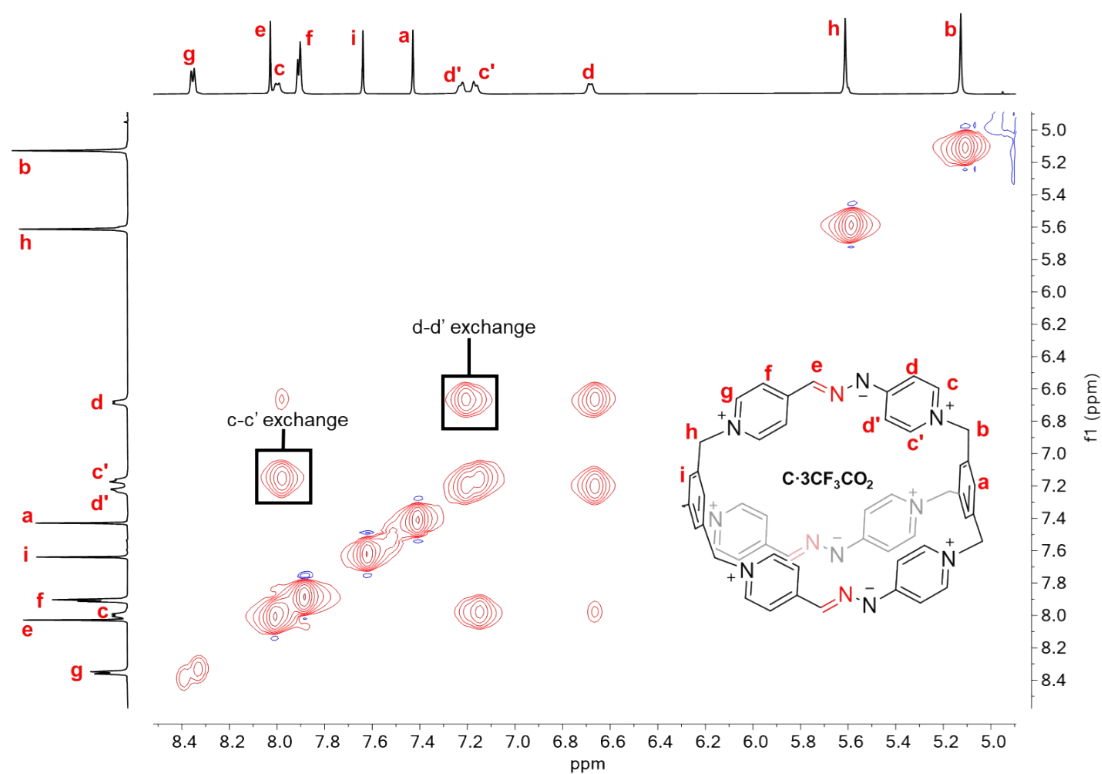

**Figure S32.**  $^1\text{H}$ - $^1\text{H}$  NOESY (500 MHz,  $\text{D}_2\text{O}$ , 298 K) spectrum of  $\text{C}\cdot 3\text{CF}_3\text{CO}_2$ . Exchange cross-peak is labeled in the spectrum.

- $\text{C}\cdot 6\text{CF}_3\text{CO}_2$  characterization in  $\text{CD}_3\text{CN}$  with 1 eq of  $\text{CF}_3\text{CO}_2\text{D}$  by NMR.

$^1\text{H}$  NMR (500 MHz,  $\text{CD}_3\text{CN}$ )  $\delta$  (ppm): 14.94 (s, 3H), 8.61 (d,  $J = 6.5$  Hz, 6H), 8.58 (s, 3H), 8.43 (dd,  $J = 7.1, 1.8$  Hz, 3H), 8.17 (d,  $J = 6.6$  Hz, 6H), 7.82 (s, 3H), 7.72 (dd,  $J = 7.4, 1.8$  Hz, 3H), 7.65 (dd,  $J = 7.5, 2.6$  Hz, 3H), 7.64 (s, 3H), 7.56 (dd,  $J = 7.1, 2.6$  Hz, 3H), 5.68 (s, 6H), 5.38 (s, 6H).

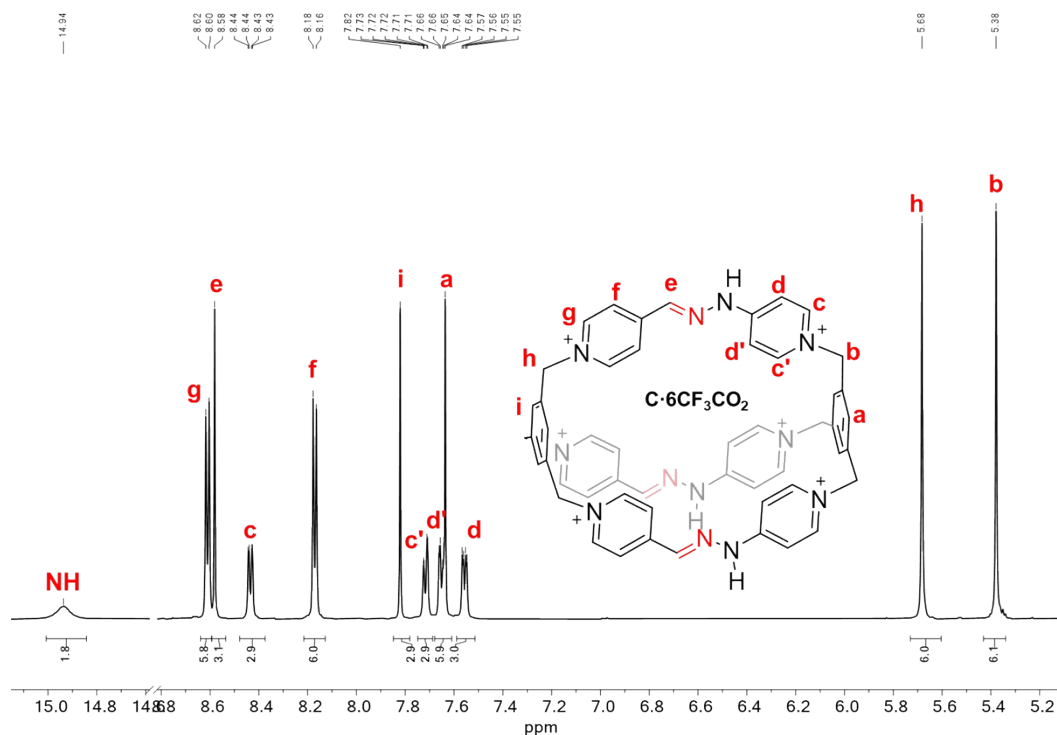

**Figure S33.**  $^1\text{H}$  NMR (500 MHz,  $\text{CD}_3\text{CN}$ , 298 K) spectrum of  $\text{C}\cdot 6\text{CF}_3\text{CO}_2$  with 1 eq. of  $\text{CF}_3\text{CO}_2\text{D}$ .

-  $\text{C}\cdot 3\text{CF}_3\text{CO}_2$  characterization in  $\text{CD}_3\text{CN}$  with 1 eq of  $\text{Et}_3\text{N}$  by NMR.

$^1\text{H}$  NMR (400 MHz,  $\text{CD}_3\text{CN}$ )  $\delta$  (ppm): 8.48 (brs, 3H), 8.42 (d,  $J = 6.4$  Hz, 6H), 8.34 (d,  $J = 6.6$  Hz, 6H), 8.24 (s, 3H), 7.99 (brs, 3H), 7.83 (s, 3H), 7.71 (s, 3H), 7.58 (brs, 3H), 7.30 (brs, 3H), 5.73 (s, 6H), 5.48 (s, 6H).

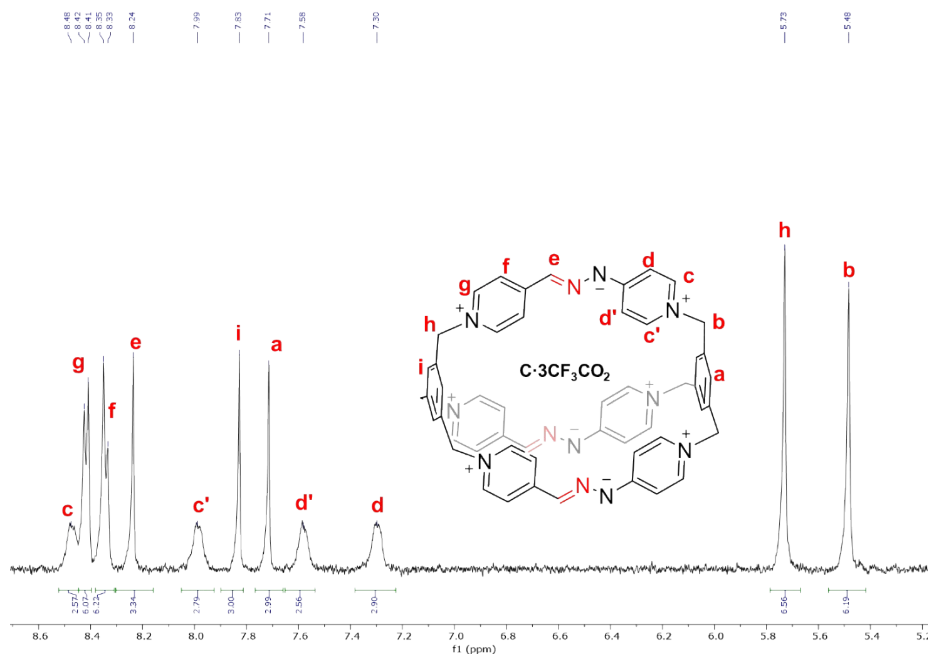

**Figure S34.**  $^1\text{H}$  NMR (400 MHz,  $\text{CD}_3\text{CN}$ , 298 K) spectrum of  $\text{C}\cdot 3\text{CF}_3\text{CO}_2$  with 1 eq. of  $\text{Et}_3\text{N}$ .

- **C·6CF<sub>3</sub>CO<sub>2</sub>** characterization in MeOD by NMR.

<sup>1</sup>H NMR (400 MHz, MeOD) δ 8.93 (d, *J* = 6.7 Hz, 6H), 8.80 (dd, *J* = 7.2, 1.7 Hz, 3H), 8.31 (d, *J* = 6.8 Hz, 6H), 8.28 (s, 3H), 8.08 (dd, *J* = 7.3, 1.7 Hz, 3H), 7.98 (s, 3H), 7.82 (s, 3H), 7.72 (dd, *J* = 7.4, 2.8 Hz, 3H), 7.28 (dd, *J* = 7.1, 2.8 Hz, 3H) 5.88 (s, 6H), 5.60 (s, 6H).

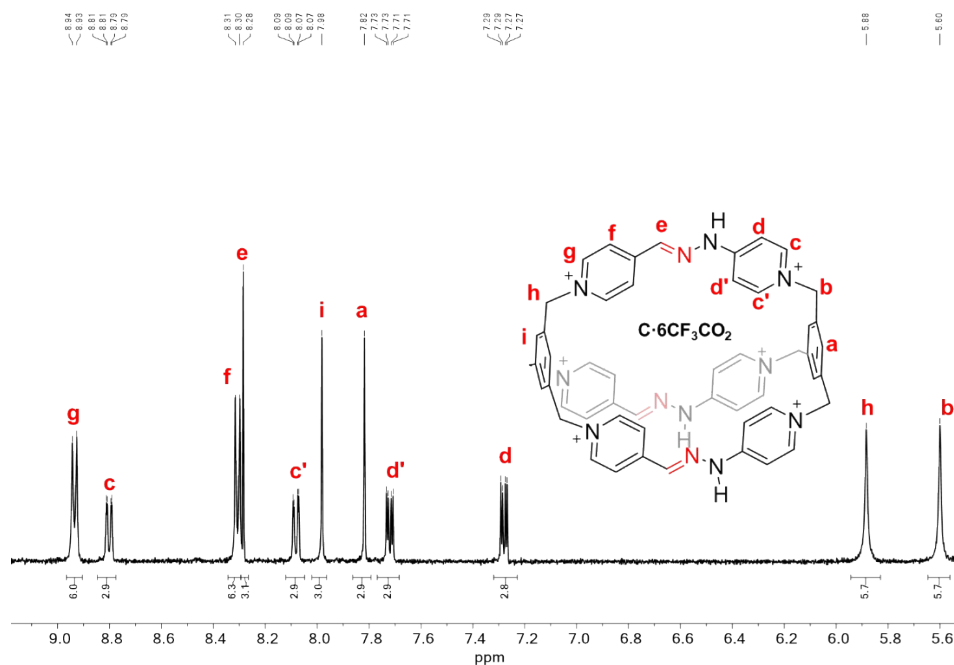

**Figure S35.** <sup>1</sup>H NMR (400 MHz, MeOD, 298 K) spectrum of **C·6CF<sub>3</sub>CO<sub>2</sub>**.

### 3. Acid-base studies of the Red Cage.

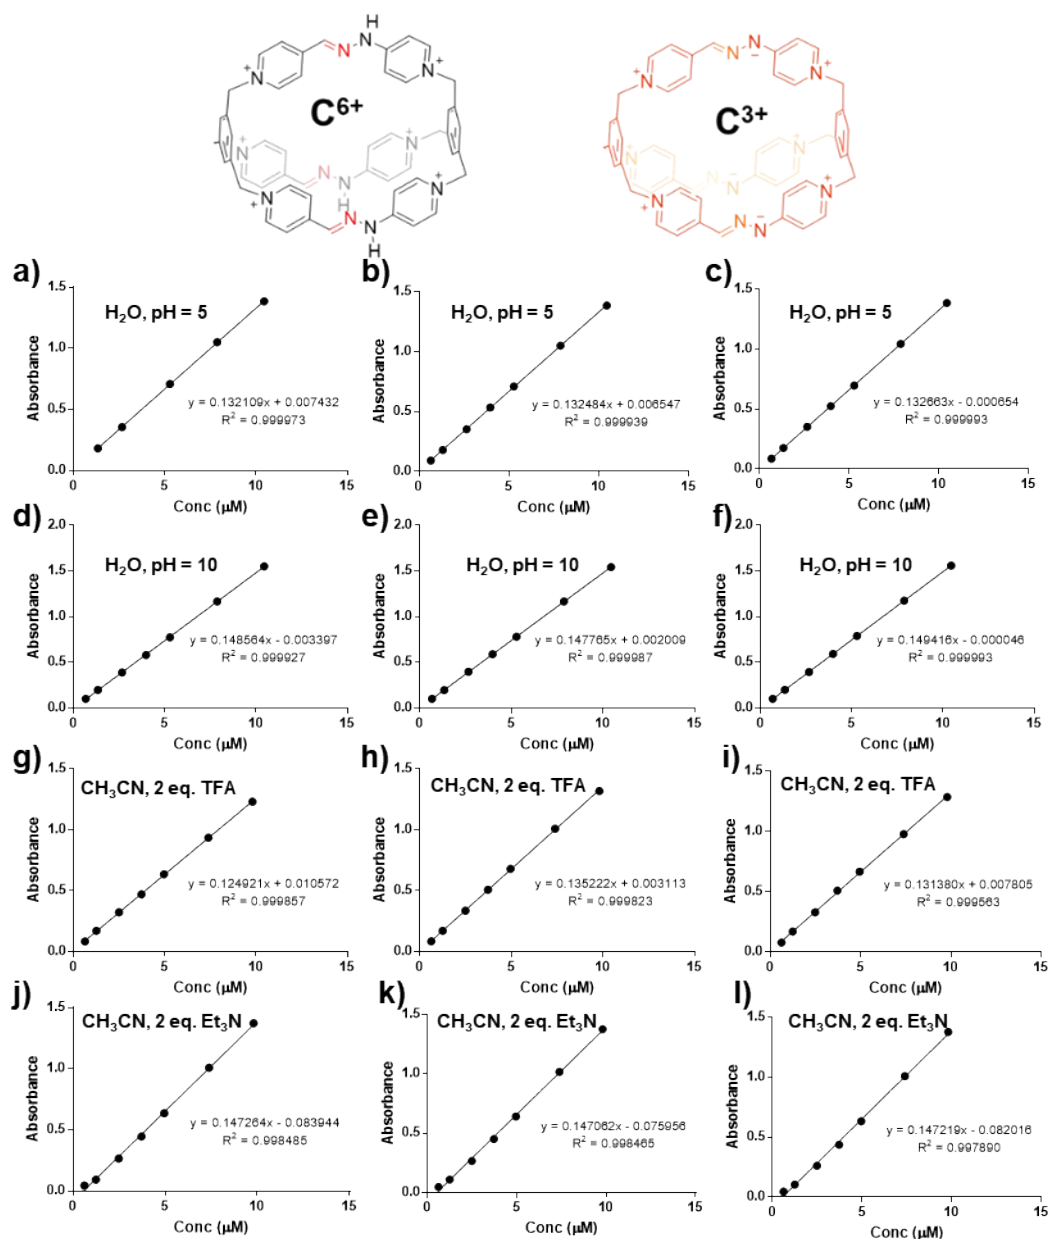

**Figure S36.** a-c) Linear relationship between absorbance at 358 nm and concentration of  $C^{6+}$  at pH 5 in  $H_2O$ , where  $\epsilon = (132.4 \pm 0.3) \times 10^3 \text{ Lmol}^{-1}\text{cm}^{-1}$ . d-f) Linear relationship between absorbance at 448 nm and concentration of  $C^{3+}$  at pH 10 in  $H_2O$ , where  $\epsilon = (148.6 \pm 0.8) \times 10^3 \text{ Lmol}^{-1}\text{cm}^{-1}$ . g-i) Linear relationship between absorbance at 356 nm and concentration of  $C^{6+}$  with 2 eq. of TFA in  $CH_3CN$ , where  $\epsilon = (130.5 \pm 5.2) \times 10^3 \text{ Lmol}^{-1}\text{cm}^{-1}$ . j-l) Linear relationship between absorbance at 478 nm and concentration of  $C^{3+}$  with 2 eq. of  $Et_3N$  in  $CH_3CN$ , where  $\epsilon = (147.2 \pm 0.1) \times 10^3 \text{ Lmol}^{-1}\text{cm}^{-1}$ .

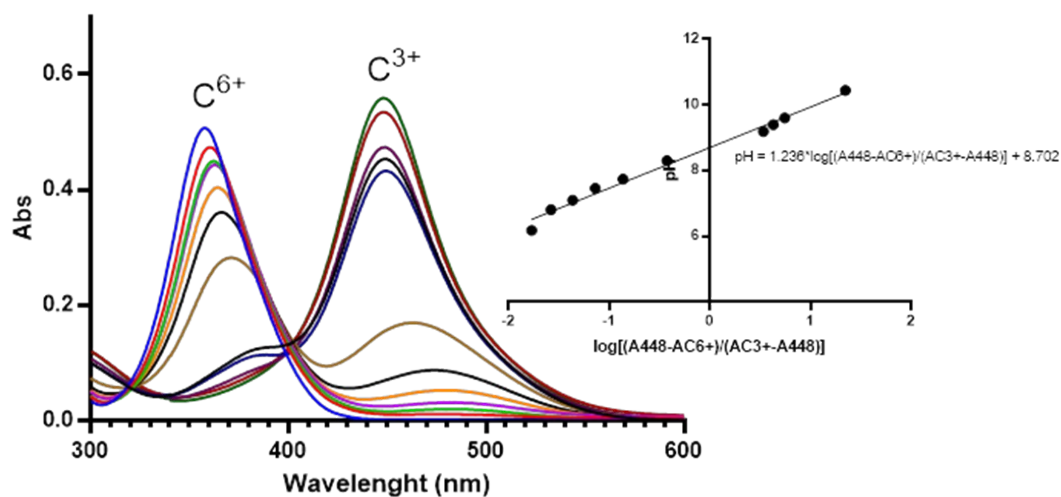

**Figure S37.** UV-Vis spectra for the titration of **C-6CF<sub>3</sub>CO<sub>2</sub>** at 4.5  $\mu$ M in NaH<sub>2</sub>PO<sub>4</sub>/Na<sub>2</sub>HPO<sub>4</sub> and NaHCO<sub>3</sub>/Na<sub>2</sub>CO<sub>3</sub> buffer. **Inset:** Linear fitting of pH plotted against  $\log[(A_{448}-A_{C6+})/(A_{C3+}-A_{448})]$ , where  $pK_a$  value is 8.70.

| pH<br>(measured) | V ( $\mu$ L)<br>solution A | V ( $\mu$ L)<br>solution B | V ( $\mu$ L)<br>solution C | V ( $\mu$ L)<br>solution D | Abs (448 nm) | $\log[(A_{448}-A_{C6+})/(A_{C3+}-A_{448})]$ |
|------------------|----------------------------|----------------------------|----------------------------|----------------------------|--------------|---------------------------------------------|
| 4,79             | 750                        | -                          | -                          | -                          | 0,0015828    | -                                           |
| 6,18             | 660                        | 90                         | -                          | -                          | 0,0108634    | -1,770815446                                |
| 6,81             | 469                        | 281                        | -                          | -                          | 0,0159067    | -1,578311243                                |
| 7,10             | 375                        | 375                        | -                          | -                          | 0,0247537    | -1,362288382                                |
| 7,46             | 210                        | 540                        | -                          | -                          | 0,0393557    | -1,138001254                                |
| 7,74             | 113                        | 637                        | -                          | -                          | 0,0688287    | -0,862125922                                |
| 8,30             | 45                         | 705                        | -                          | -                          | 0,1535647    | -0,425457217                                |
| 9,19             | -                          | -                          | 750                        | -                          | 0,4316977    | 0,530893575                                 |
| 9,40             | -                          | 750                        | -                          | -                          | 0,452876     | 0,631219915                                 |
| 9,60             | -                          | -                          | 675                        | 75                         | 0,4734347    | 0,744703678                                 |
| 10,44            | -                          | -                          | 375                        | 375                        | 0,5344227    | 1,34729122                                  |
| 10,96            | -                          | -                          | 150                        | 600                        | 0,5583727    | -                                           |

**Solution A:** 4.5  $\mu$ M of **C-6CF<sub>3</sub>CO<sub>2</sub>** and 0.05 M of NaH<sub>2</sub>PO<sub>4</sub>. **Solution B:** 4.5  $\mu$ M of **C-6CF<sub>3</sub>CO<sub>2</sub>** and 0.05 M of Na<sub>2</sub>HPO<sub>4</sub>. **Solution C:** 4.5  $\mu$ M of **C-6CF<sub>3</sub>CO<sub>2</sub>** and 0.05 M of NaHCO<sub>3</sub>. **Solution D:** 4.5  $\mu$ M of **C-6CF<sub>3</sub>CO<sub>2</sub>** and 0.05 M of Na<sub>2</sub>CO<sub>3</sub>.

**Table S1.** Experimental data obtained for the UV-Vis titration of **C-6CF<sub>3</sub>CO<sub>2</sub>** at 4.5  $\mu$ M in NaH<sub>2</sub>PO<sub>4</sub>/Na<sub>2</sub>HPO<sub>4</sub> and NaHCO<sub>3</sub>/Na<sub>2</sub>CO<sub>3</sub> buffer.

#### 4. Determination of the energy of the rotational barrier ( $\Delta G^\ddagger$ ).

The coalescence temperature ( $T_c$ ) could be estimated for different protons on VT NMR experiments. This provides, in association with the maximum peak separation ( $\Delta\nu$  in Hz) at slow exchange between **c** – **c'** and **d** – **d'**, the energy of the rotational barrier using Equation (1).<sup>S1</sup>

$$\Delta G^\ddagger = 4.57 \cdot 10^{-3} T_c (9.972 + \log T_c / \Delta\nu) \quad (1)$$

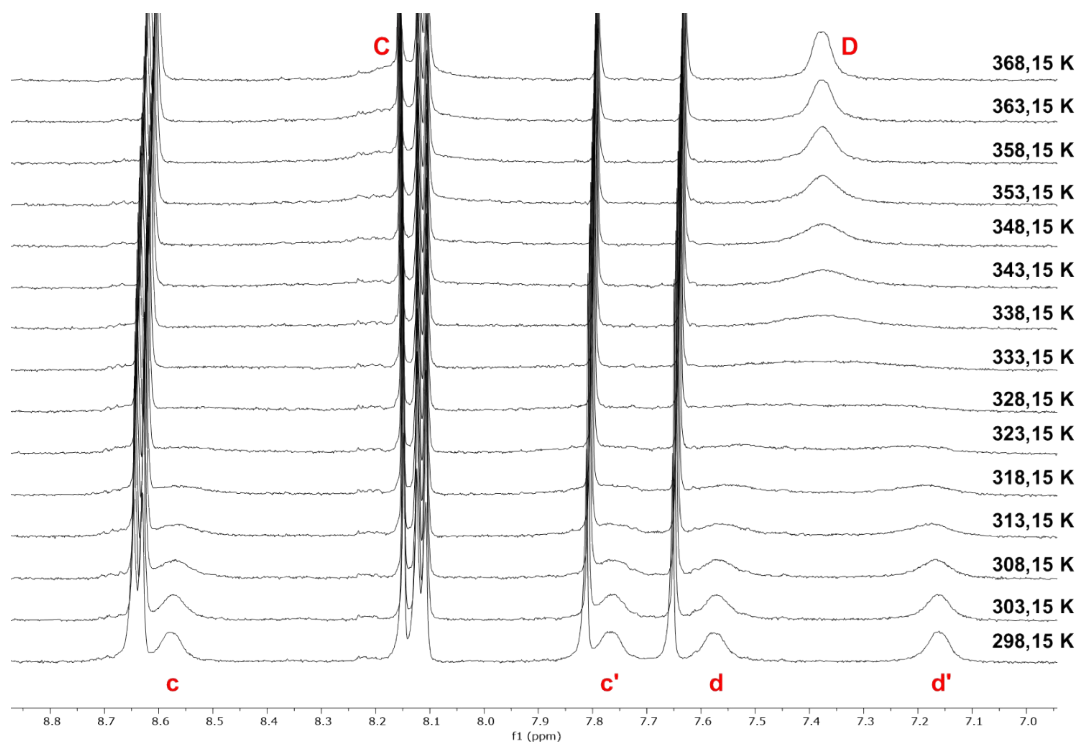

**Figure S38.** VT  $^1\text{H}$  NMR (500 MHz,  $\text{D}_2\text{O}$ , 298 K) stacked spectra for **C**· $6\text{CF}_3\text{CO}_2$ .

| Signal | $\Delta\nu_c$ (Hz) | $T_c$ (K) | $\Delta G^\ddagger$ (kcal mol $^{-1}$ ) |
|--------|--------------------|-----------|-----------------------------------------|
| c – c' | 326,14             | 343,15    | 15,7                                    |
| d – d' | 164,45             | 333,15    | 15,5                                    |

**Table S2.** Experimental data obtained for the calculation of  $\Delta G^\ddagger$  via coalescence temperatures of various signals on the VT  $^1\text{H}$  NMR of **C**· $6\text{CF}_3\text{CO}_2$  in water.

## 5. Guest recognition ability of C·6Cl.

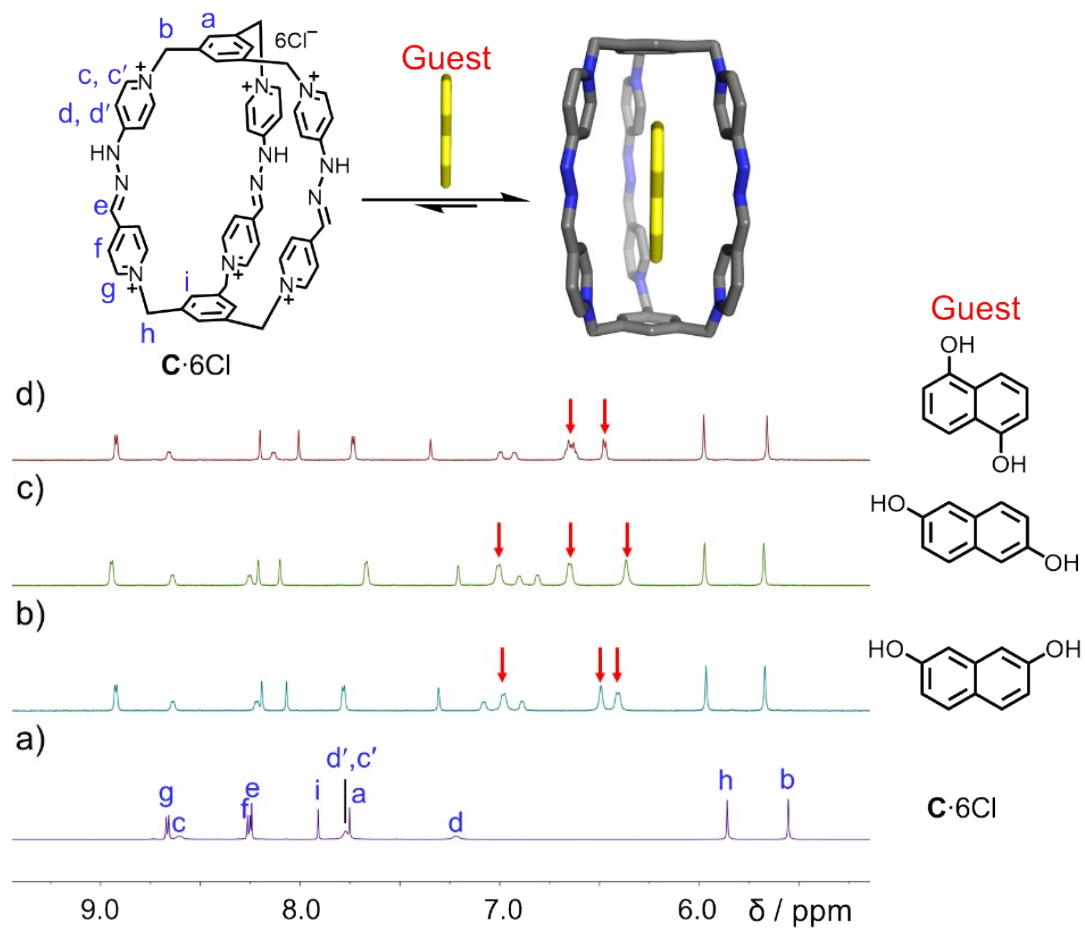

**Figure S39.** <sup>1</sup>H NMR spectrum (500 MHz, D<sub>2</sub>O, 298 K) of a) C·6Cl, b) C·6Cl with 2,7-DHN (2 eq), c) C·6Cl with 2,6-DHN (2 eq) and d) C·6Cl with 1,5-DHN (2 eq.).

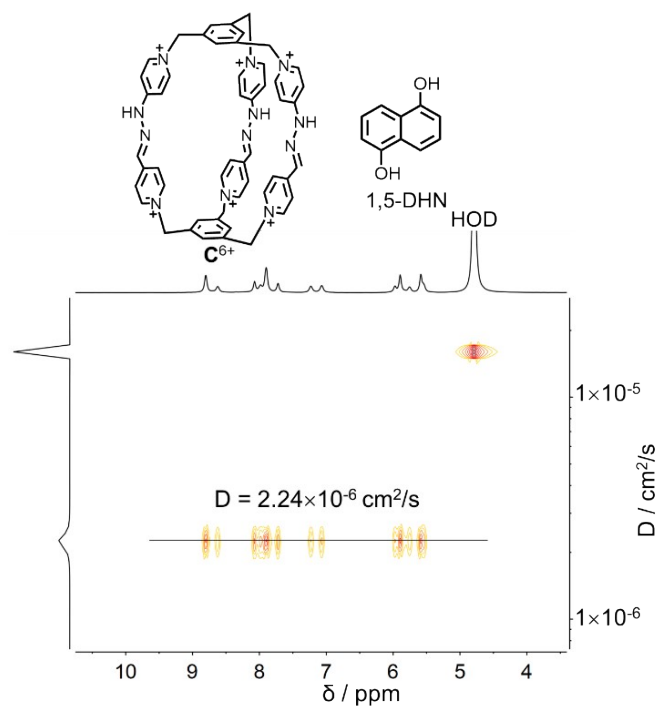

**Figure S40.** <sup>1</sup>H DOSY spectrum of 1:1 mixture of **1,5-DHN** and **C·6Cl**. The spectrum demonstrates that both **1,5-DHN** and **C·6Cl** have the same diffusion coefficient, implying the formation of complex **1,5-DHN**  $\subset$  **C·6Cl**.

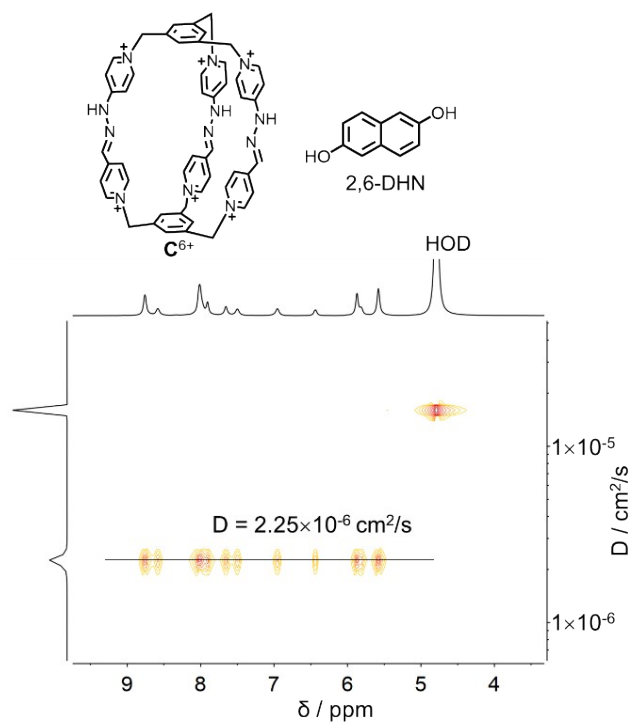

**Figure S41.** <sup>1</sup>H DOSY spectrum of 1:1 mixture of **2,6-DHN** and **C·6Cl**. The spectrum demonstrates that both **2,6-DHN** and **C·6Cl** have the same diffusion coefficient, implying the formation of complex **2,6-DHN**  $\subset$  **C·6Cl**.

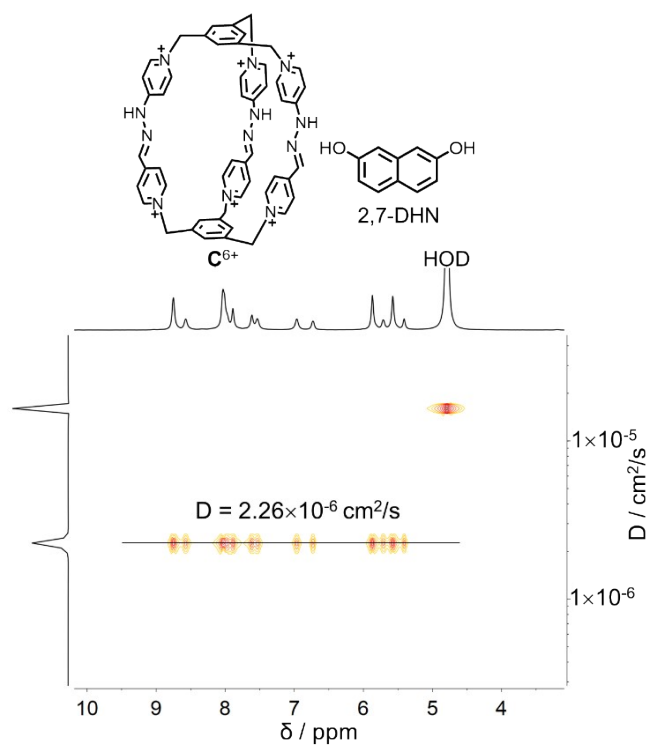

**Figure S42.**  $^1\text{H}$  DOSY spectrum of 1:1 mixture of **2,7-DHN** and **C·6Cl**. The spectrum demonstrates that both **2,7-DHN** and **C·6Cl** have the same diffusion coefficient, implying the formation of complex **2,7-DHN**  $\subset$  **C·6Cl**.

## 6. $^1\text{H}$ NMR titration experiments determination of $K_a$ value for inclusion complexes in water.

-  $1,5\text{-DHN} \subset \text{C}\cdot 6\text{Cl}$ .

$^1\text{H}$  NMR spectroscopic studies were performed (Figure S43) to calculate the binding constant of  $1,5\text{-DHN} \subset \text{C}\cdot 6\text{Cl}$ . We titrated the sample of  $\text{C}^{6+}$  with  $1,5\text{-DHN}$  in  $\text{D}_2\text{O}$ . The corresponding  $^1\text{H}$  NMR spectra demonstrated (Figure S44) that the binding constant is around  $1.5 (\pm 0.2) \times 10^4 \text{ M}^{-1}$ .

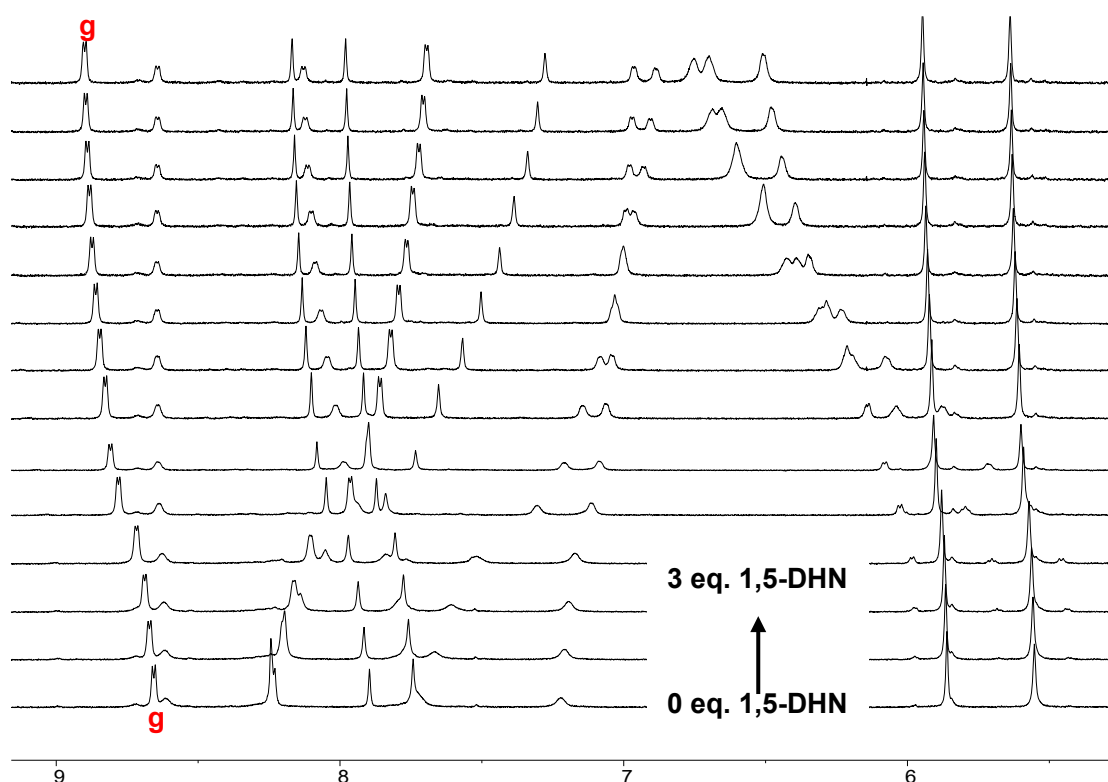

**Figure S43.** Partial  $^1\text{H}$  NMR spectra (600 MHz,  $\text{D}_2\text{O}$ , 298 K) of  $\text{C}\cdot 6\text{Cl}$  upon addition of 0-3 eq. of  $1,5\text{-DHN}$ .  $[\text{C}\cdot 6\text{Cl}] = 0.5 \text{ mM}$  for all spectra.

The mechanism proposed for the fitting process equilibria, and introduced on the software *Dynafit* was the following:<sup>S2</sup>  $\text{C}^{6+} + 2,7\text{-DHN} \rightleftharpoons 2,7\text{-DHN} \subset \text{C}^{6+}$

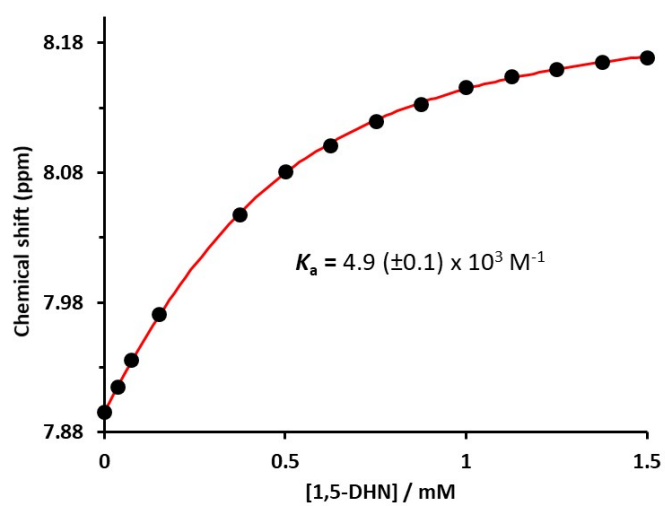

**Figure S44.** Fitting of the experimental data (circles) of signal  $H_g$ .

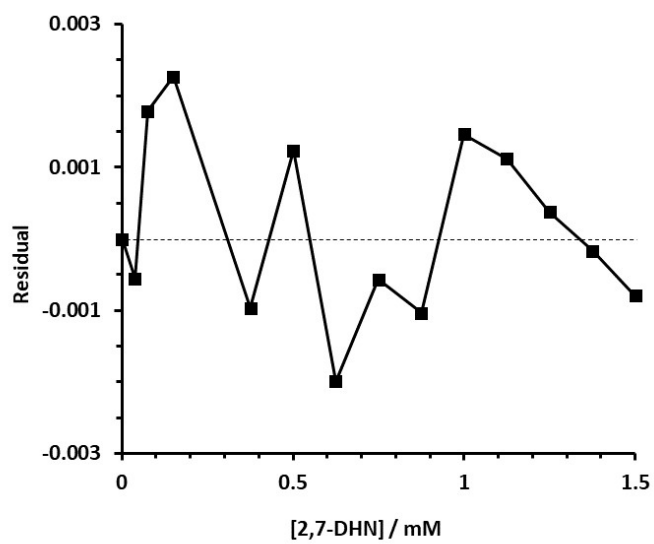

**Figure S45.** Residuals of the fitting of signal  $H_g$ .

- **2,6-DHN**  $\subset$  **C·6Cl**.

$^1\text{H}$  NMR spectroscopic studies were performed (Figure S45) to calculate the binding constant of **2,6-DHN**  $\subset$  **C·6Cl**. We titrated the sample of **C**<sup>6+</sup> with **2,6-DHN** in D<sub>2</sub>O. The corresponding  $^1\text{H}$  NMR spectra demonstrated (Figure S46) that the binding constant of **2,6-DHN**  $\subset$  **C·6Cl** is around  $4.0 (\pm 0.2) \times 10^3 \text{ M}^{-1}$ .

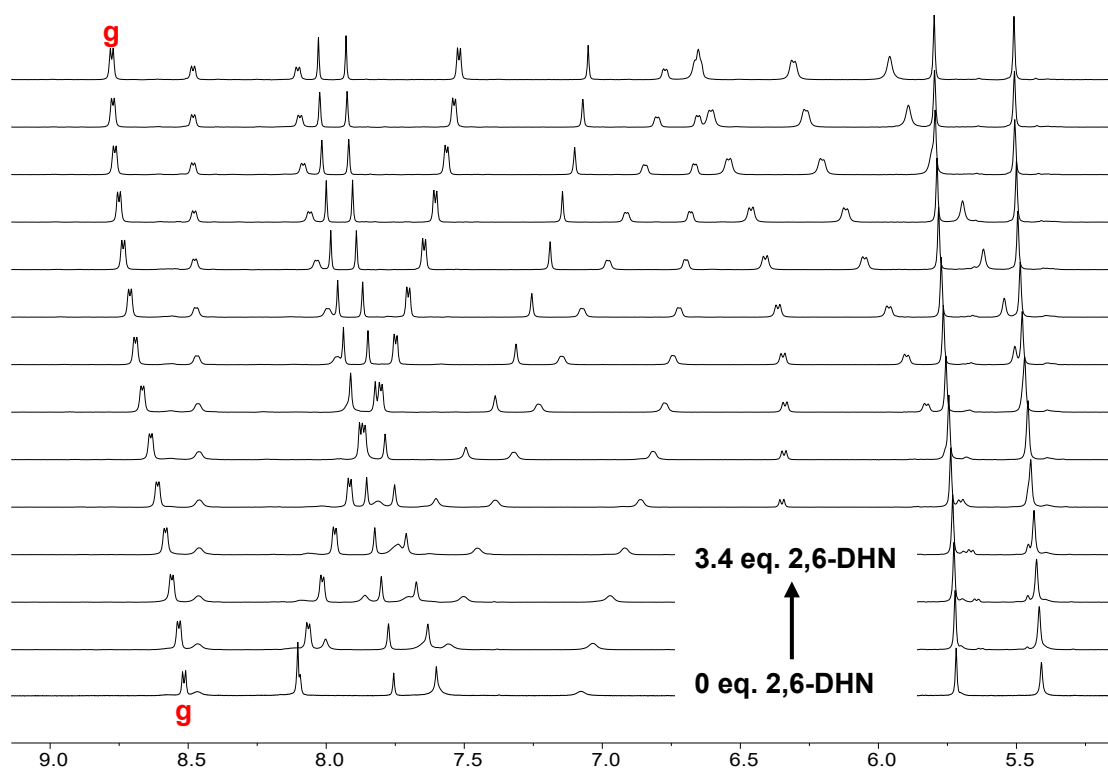

**Figure S46.** Partial  $^1\text{H}$  NMR spectra (600 MHz, D<sub>2</sub>O, 298 K) of **C·6Cl** upon addition of 0-3.4 eq. of **2,6-DHN**. [**C·6Cl**] = 0.5 mM for all spectra.

The mechanism proposed for the fitting process equilibria, and introduced on the software *Dynafit* was the following:<sup>S2</sup> **C**<sup>6+</sup> + **2,6-DHN**  $\rightleftharpoons$  **2,6-DHN** $\subset$ **C**<sup>6+</sup>

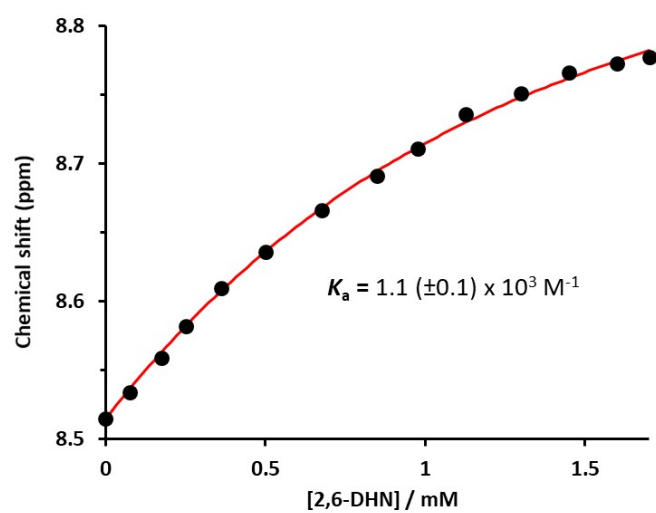

**Figure S47.** Fitting of the experimental data (circles) of signal  $H_g$ .

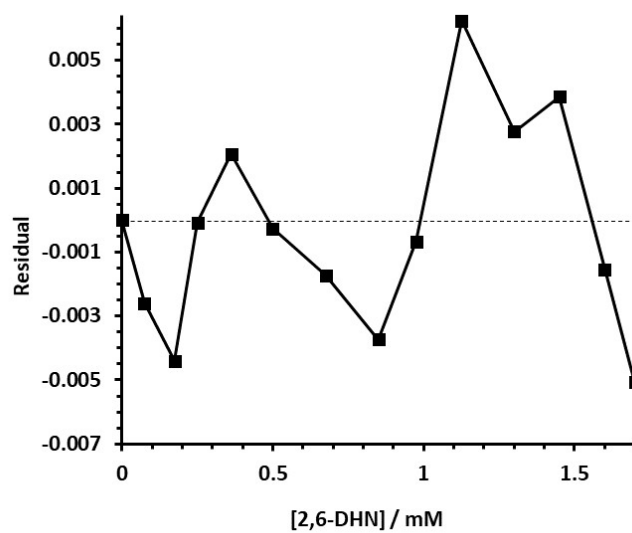

**Figure S48.** Residuals of the fitting of signal  $H_g$ .

- **2,7-DHN  $\subset$  C $\cdot$ 6Cl.**

$^1\text{H}$  NMR spectroscopic studies were performed (Figure S47) to calculate the binding constant of **2,7-DHN  $\subset$  C $\cdot$ 6Cl**. We titrated the sample of **C $^{6+}$**  with **2,7-DHN** in  $\text{D}_2\text{O}$ . The corresponding  $^1\text{H}$  NMR spectra demonstrated (Figure S48) that the binding constant of **2,7-DHN  $\subset$  C $\cdot$ 6Cl** is around  $1.2 (\pm 0.3) \times 10^4 \text{ M}^{-1}$ .

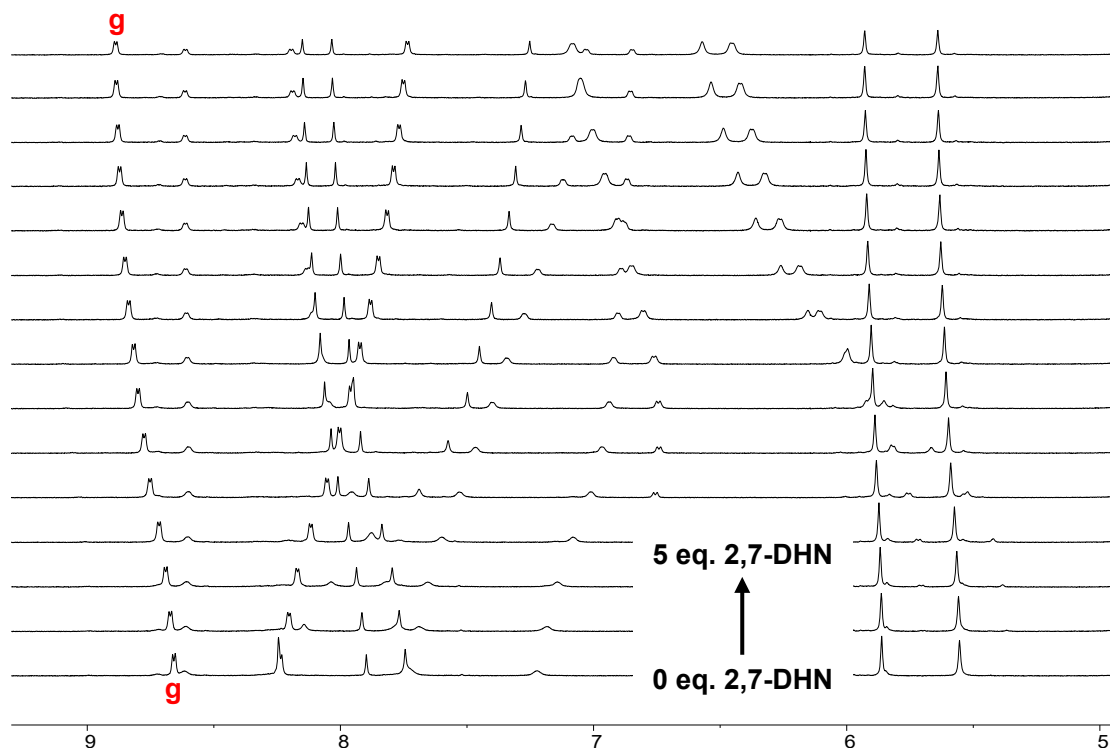

**Figure S49.** Partial  $^1\text{H}$  NMR spectra (600 MHz,  $\text{D}_2\text{O}$ , 298 K) of **C $\cdot$ 6Cl** upon addition of 0-5 eq. of **2,7-DHN**. [**C $\cdot$ 6Cl**] = 0.5 mM for all spectra.

The mechanism proposed for the fitting process equilibria, and introduced on the software *Dynafit* was the following:<sup>S2</sup> **C $^{6+}$  + 2,7-DHN  $\rightleftharpoons$  2,7-DHN $\subset$ C $^{6+}$**

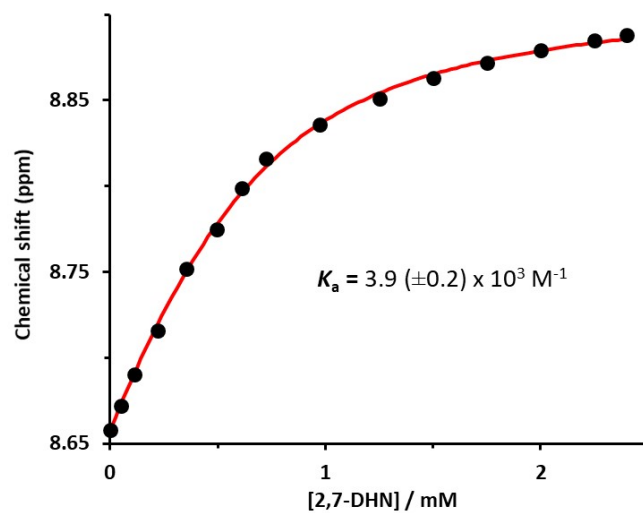

**Figure S50.** Fitting of the experimental data (circles) of signal  $H_g$ .

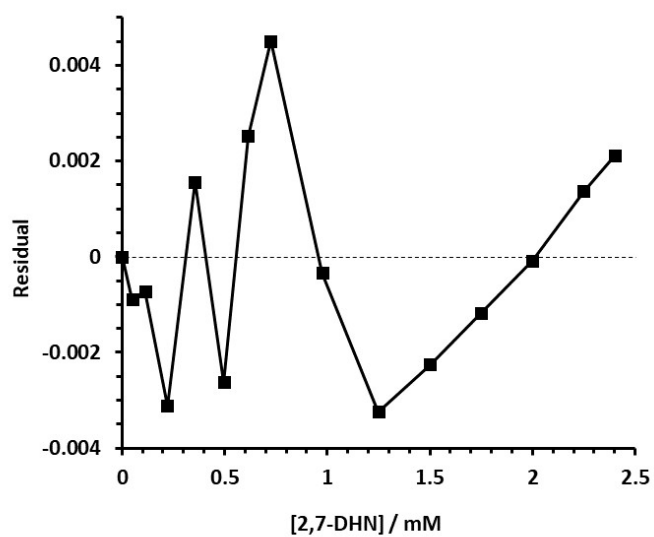

**Figure S51.** Fitting of the experimental data (circles) of signal  $H_g$ .

- **1,5-DHNC**  $\subset$  **C·6CF<sub>3</sub>CO<sub>2</sub>** at pD = 2.

To carry out the titration, mixture of **C·6CF<sub>3</sub>CO<sub>2</sub>** and 1,5-DHNC of different proportion were prepared from appropriate stocks solutions in NaH<sub>2</sub>PO<sub>4</sub>/H<sub>3</sub>PO<sub>4</sub> buffer at pD = 2.

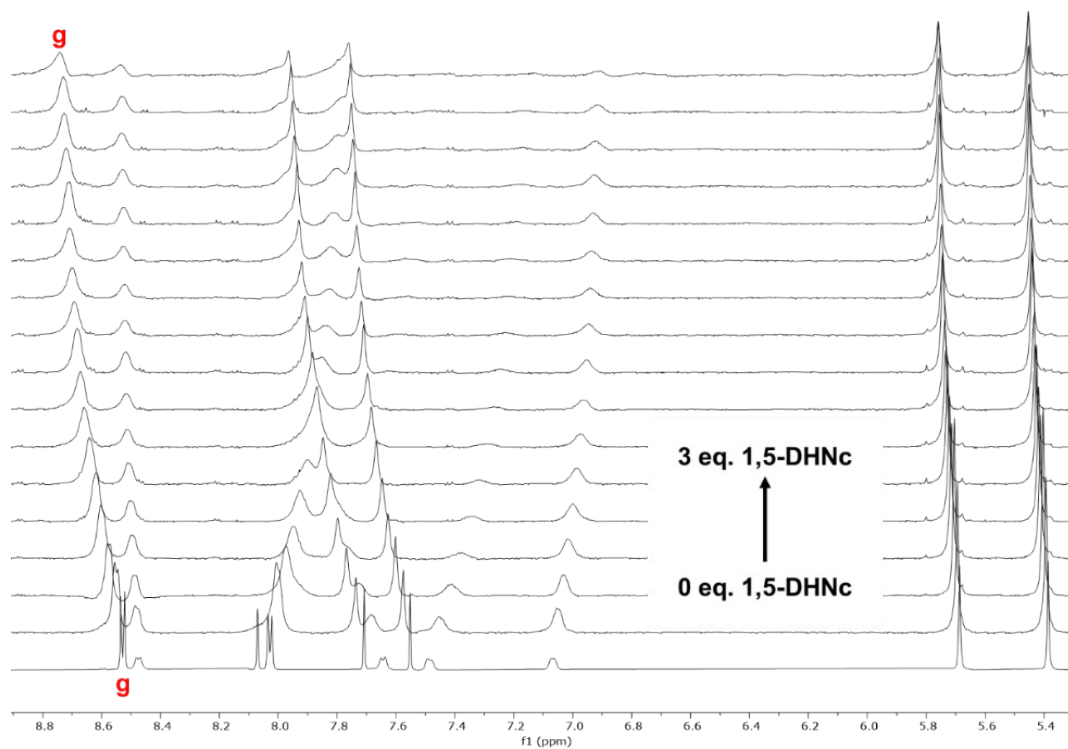

**Figure S52.** <sup>1</sup>H NMR (500 MHz, D<sub>2</sub>O, 298 K) spectra of **C·6CF<sub>3</sub>CO<sub>2</sub>** (0.5 mM) upon titration with 1,5-DHNC.

The mechanism proposed for the fitting process equilibria and introduced on the software *Dynafit* was the following:<sup>S2</sup> **C<sup>6+</sup> + 1.5-DHNC**  $\rightleftharpoons$  **1.5-DHNC** $\subset$ **C<sup>6+</sup>**

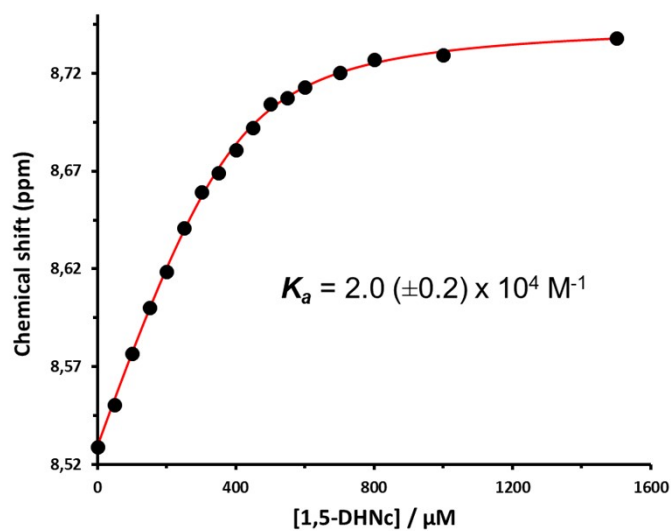

**Figure S53.** Fitting of the experimental data (circles) of signal  $H_g$ .

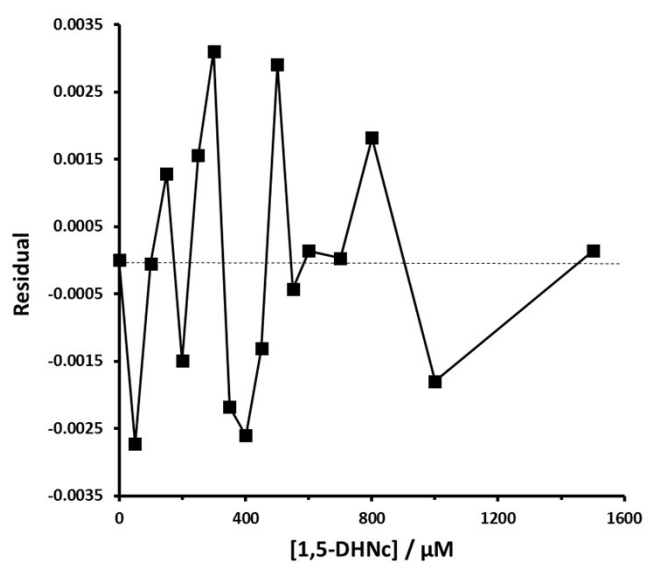

**Figure S54.** Residuals of the fitting of signal  $H_g$ .

- **1,5-DHNC**  $\subset$  **C·6CF<sub>3</sub>CO<sub>2</sub>** at pD = 12.

To carry out the titration, mixture of **C·3CF<sub>3</sub>CO<sub>2</sub>** and 1,5-DHNC of different proportion were prepared from appropriate stocks solutions in Na<sub>3</sub>PO<sub>4</sub>/Na<sub>2</sub>HPO<sub>4</sub> buffer at pD = 12.

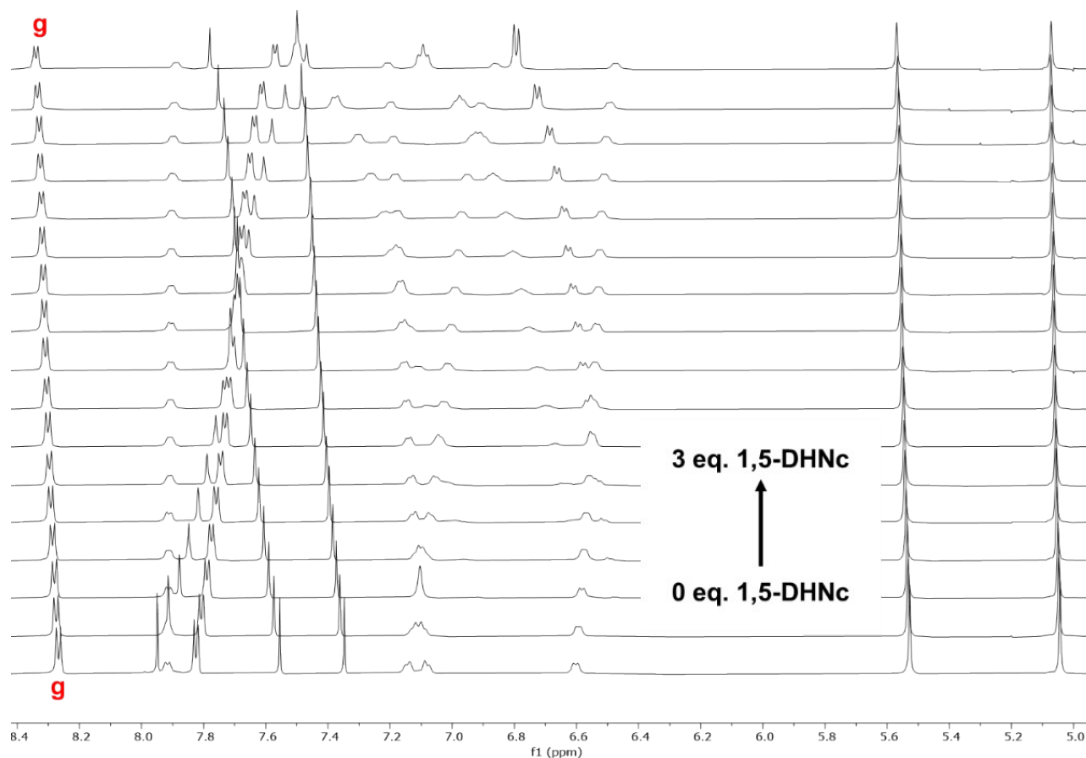

**Figure S55.**  $^1\text{H}$  NMR (500 MHz,  $\text{D}_2\text{O}$ , 298 K) spectra of  $\text{C}\cdot 3\text{CF}_3\text{CO}_2$  (0.5 mM) upon titration with 1,5-DHNc.

The mechanism proposed for the fitting process equilibria, and introduced on the software

*Dynafit* was the following:<sup>S2</sup>  $\text{C}^{3+} + 1.5\text{-DHNc} \rightleftharpoons 1.5\text{-DHNc}\text{-C}^{3+}$

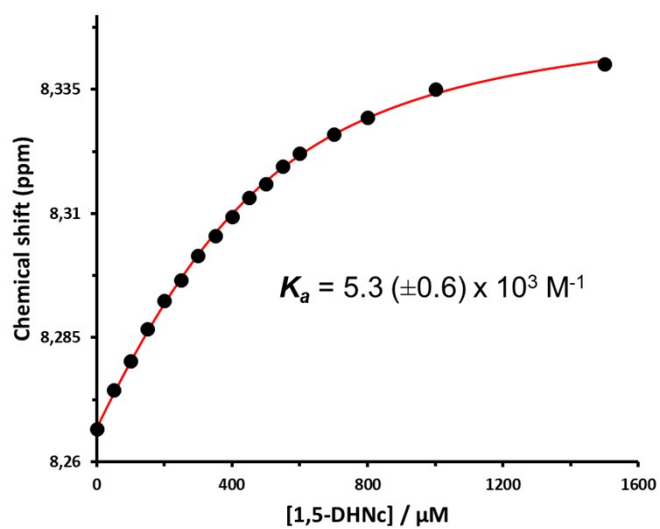

**Figure S56.** Fitting of the experimental data (circles) of signal  $\text{H}_g$ .

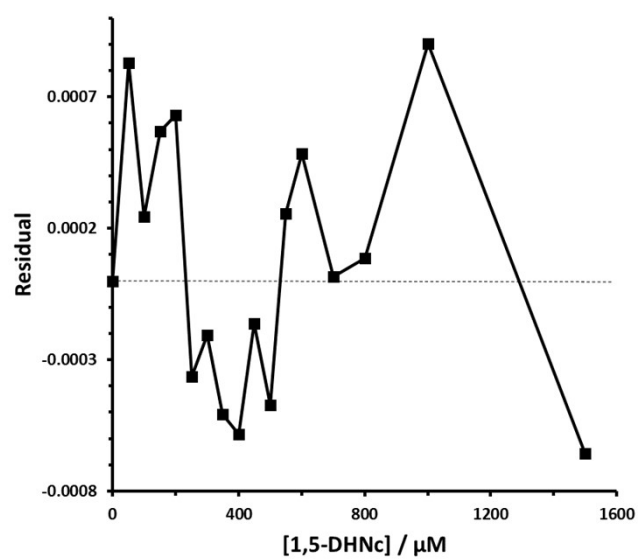

**Figure S57.** Residuals of the fitting of signal  $H_g$ .

## 7. X-ray Crystallography

### 1) **C**·6Cl

#### a) Methods

Single crystals of **C**·6Cl, suitable for X-ray crystallography, were grown by slow vapor diffusion of acetone into solution of **C**<sup>6+</sup> (in water) over the course of days. Data were collected at 170 K on a Bruker APEX-II CCD Diffractometer equipped with a GaK $\alpha$   $\mu$ S source and MX optic.

#### b) Crystal parameters

[C<sub>51</sub>H<sub>56</sub>Cl<sub>6</sub>N<sub>12</sub>O<sub>4</sub>], red block (0.16×0.08×0.06mm), Triclinic, space group P-1,  $a = 10.6132(19)$  Å,  $b = 15.730(3)$  Å,  $c = 21.174(4)$  Å,  $\alpha = 83.737(6)^\circ$ ,  $\beta = 78.244(7)^\circ$ ,  $\gamma = 89.362(5)^\circ$ ,  $V = 3440.0(11)$  Å<sup>3</sup>,  $Z = 2$ ,  $T = 170$  K,  $\rho_{\text{calc}} = 1.075$  g/cm<sup>3</sup>,  $\mu(\text{GaK}\alpha) = 1.34139$  mm<sup>-1</sup>. A total of 29893 reflections were collected, of which 11269 were unique. Final  $R_1(wR_2)$  [ $I > 2\sigma(I)$ ] = 0.1421(0.3164) and  $R_1(wR_2)$  (all data) = 0.2506(0.3924). The structure was solved by direct method and different Fourier syntheses. Using Olex2<sup>S3</sup>, the structure was solved with the ShelXT<sup>S4</sup> structure solution program using Intrinsic Phasing and refined with the ShelXL<sup>S5</sup> refinement package using Least Squares minimization. CCDC number: 1988842.

#### c) Solid-state structure

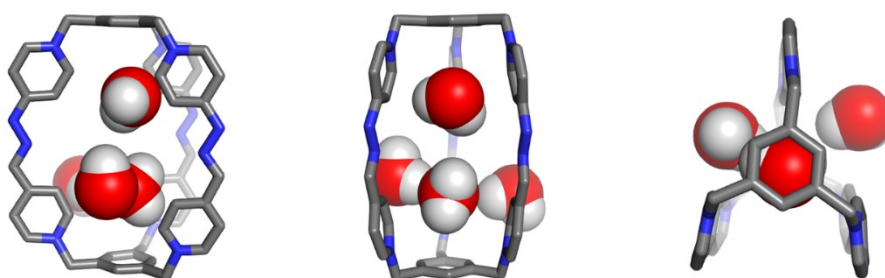

**Figure S58.** Different views of the solid-state structure of **C**·6Cl. Carbon, grey; nitrogen blue; red, oxygen; Hydrogen, white. Hydrogen atoms of para-capsule **C**<sup>6+</sup>, other counterions and disordered solvent molecules are omitted for clarity.

### 2) **2,7-DHN** $\subset$ **C**<sup>6+</sup>

#### a) Methods

Single crystals of **2,7-DHN**  $\subset$  **C**<sup>6+</sup>, suitable for X-ray crystallography, were grown by slow

vapor diffusion of acetone into solution of **2,7-DHN**  $\subset$  **C<sup>6+</sup>** (in water) over the course of days. Data were collected at 170 K on a Bruker APEX-II CCD Diffractometer equipped with a GaK $\alpha$   $\mu$ S source and MX optic.

b) Crystal parameters

[C<sub>61</sub>H<sub>54</sub>Cl<sub>4</sub>N<sub>12</sub>O<sub>2</sub>], red block (0.08 × 0.06 × 0.05 mm), Triclinic, space group P-1,  $a = 10.4351(5)$  Å,  $b = 15.6984(7)$  Å,  $c = 20.2493(8)$  Å,  $\alpha = 78.582(3)^\circ$ ,  $\beta = 79.242(3)^\circ$ ,  $\gamma = 88.796(3)^\circ$ ,  $V = 3193.9(2)$  Å<sup>3</sup>,  $Z = 2$ ,  $T = 170$  K,  $\rho_{\text{calc}} = 1.174$  g/cm<sup>3</sup>,  $\mu(\text{GaK}\alpha) = 1.34139$  mm<sup>-1</sup>. A total of 33571 reflections were collected, of which 11962 were unique. Final  $R_1(wR_2)$  [ $I > 2\sigma(I)$ ] = 0.1619(0.3347) and  $R_1(wR_2)$  (all data) = 0.3238(0.4302). The structure was solved by direct method and different Fourier syntheses. Using Olex2,<sup>S3</sup> the structure was solved with the ShelXT<sup>S4</sup> structure solution program using Intrinsic Phasing and refined with the ShelXL<sup>S5</sup> refinement package using Least Squares minimization. CCDC number: 1988362.

c) Solid-state structure

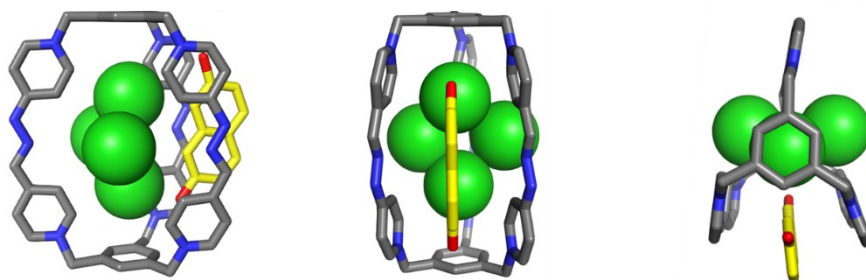

**Figure S59.** Different views of the solid-state structure of **2,7-DHN**  $\subset$  **C<sup>6+</sup>**. Carbon, grey in the host and yellow in the guest; nitrogen, blue; red, oxygen. Hydrogen atoms and disordered solvent molecules are omitted for clarity.

## 8. References

- S1. a) J. Sandstrom, *Dynamic NMR Spectroscopy*; Academic Press: New York, NY, USA, **1983**. b) H. Kessler, *Angew. Chem. Int. Ed.* **1970**, *9*, 219-235.
- S2. P. Kuzmic, *Anal. Biochem* **1996**, *237*, 260-273
- S3. Dolomanov, O. V.; Bourhis, L. J.; Gildea, R. J.; Howard, J. A. K.; Puschmann, H. *J. Appl. Cryst.* **2009**, *42*, 339-341.
- S4. Sheldrick, G. M. *Acta Cryst.* **2015**, *A71*, 3-8.
- S5. Sheldrick, G. M. *Acta Cryst.* **2015**, *C71*, 3-8.
